# Supplementary material for: Genetic variability inRuditapes decussatusclam combined withPerkinsusinfection level to support founder population selection for a breeding program
Source: PeerJ journal article supplement (doi:10.7717/peerj.9728), 2020-10-28
Supplement: File2.xlsx [file File2.xlsx]

## Sheet: El Tesón, Ría de Ribadeo (SP)
Species:	R. decussatus			Origin:	El Tesón, Ría de Ribadeo, Spain				Reception date:		2017-10-25
Weight (Kg):	1.027	Number of clams:		79 Rd+3 Rp
							Reference:	RdRib25102017
Sampling date:	2017-10-25
Clam No.	Reference	Lenght (mm)	Height (mm)	Thickness (mm)	Total weight (g)	Empty shell weight (g)	Viscera weight (g)	Gonad weight (g)	Visceral index	Gonadal index	Perkinsus infection
1	RdRib25102017-001	40.26	29.86	20.54	15.17	7.56	4.77	1.32	63.0952	17.4603	0
2	RdRib25102017-002	42.29	29.98	21.28	18.12	9.98	4.62	0.83	46.2926	8.31663	1
3	RdRib25102017-003	38.76	28.75	19.86	13.93	7.23	3.86	0.79	53.3887	10.9267	1
4	RdRib25102017-004	38.1	27.22	19.02	12.16	6.32	3.72	0.81	58.8608	12.8165	0
5	RdRib25102017-005	43.26	30.76	21.66	17.29	8.52	5.12	1.08	60.0939	12.6761	0
6	RdRib25102017-006	37.91	27.28	18.44	12.04	6.29	3.35	0.8	53.2591	12.7186	0					Perkinsus infection
7	RdRib25102017-007	38.98	28.22	18.71	13.22	7.17	3.71	0.87	51.7434	12.1339	0					Stage	Number	%
8	RdRib25102017-008	37.33	26.63	18.43	11.69	5.98	3.06	0.69	51.1706	11.5385	0					0	44	88
9	RdRib25102017-009	42.28	30.14	19.28	15.17	7.38	4.29	1.01	58.1301	13.6856	1					1	6	12
10	RdRib25102017-010	41.26	29.36	19.43	14.44	7.64	3.9	0.85	51.0471	11.1257	0					2	0	0
11	RdRib25102017-011	36.49	27.97	18.23	12.51	6.82	3.06	0.63	44.868	9.23754	0					3	0	0
12	RdRib25102017-012	38.14	29.26	20.35	14.21	7.32	4.43	1.11	60.5191	15.1639	0					4	0	0
13	RdRib25102017-013	41.83	30.35	20.21	15.91	8.8	4.24	0.87	48.1818	9.88636	0					5	0	0
14	RdRib25102017-014	40.67	29.15	19.13	13.21	6.99	3.74	1.04	53.505	14.8784	0					Total	50	100
15	RdRib25102017-015	38.51	27.2	19.06	12.23	6.56	3.53	0.88	53.811	13.4146	0					Perkinsus infection(%)	4
16	RdRib25102017-016	47.05	32.63	23.23	23.48	12.61	5.41	1.2	42.9025	9.51626	1					A.U.	6
17	RdRib25102017-017	40.52	27.84	19.9	13.37	7.07	3.39	0.86	47.9491	12.1641	0
18	RdRib25102017-018	35.3	26.61	18.15	10.34	5.51	2.97	0.79	53.902	14.3376	0
19	RdRib25102017-019	39.83	29.05	18.67	13.1	6.67	3.77	1	56.5217	14.9925	0
20	RdRib25102017-020	37.83	27.46	18.54	11.5	6.59	2.89	0.8	43.8543	12.1396	0
21	RdRib25102017-021	39.8	28.79	18.78	13.18	6.95	3.31	0.76	47.6259	10.9353	0
22	RdRib25102017-022	40.04	28.24	18.92	13.27	6.87	2.91	1.1	42.3581	16.0116	0
23	RdRib25102017-023	43.68	31.97	22.51	19.86	10.35	4.87	0.77	47.0531	7.43961	0
24	RdRib25102017-024	38.05	28.09	18.98	12.69	6.6	4.1	1.02	62.1212	15.4545	0
25	RdRib25102017-025	36.28	26.99	18.7	11.92	6.25	3.72	0.82	59.52	13.12	0
26	RdRib25102017-026	36.62	27.09	18.21	10.23	5.8	3.28	0.87	56.5517	15	0
27	RdRib25102017-027	39.2	29.16	19.33	13.21	6.96	3.93	1.06	56.4655	15.2299	0
28	RdRib25102017-028	36.64	27.36	18.98	11.97	6.47	3.53	0.81	54.5595	12.5193	0
29	RdRib25102017-029	36.76	28.11	18.7	12.37	5.93	3.62	1	61.0455	16.8634	0
30	RdRib25102017-030	38.55	28.2	18.53	12.39	6.36	3.8	1.07	59.7484	16.8239	0
31	RdRib25102017-031	40.96	29.72	20.23	15.28	7.83	4.07	1.09	51.9796	13.9208	0
32	RdRib25102017-032	37.57	25.99	17.21	10.15	5.06	3.18	0.75	62.8458	14.8221	0
33	RdRib25102017-033	39.48	28.37	19.4	13.4	6.99	3.38	0.84	48.3548	12.0172	0
34	RdRib25102017-034	36.18	25.77	17.72	10.11	5.15	2.96	0.73	57.4757	14.1748	0
35	RdRib25102017-035	37.46	25.95	19.06	12.04	6.44	3.57	0.91	55.4348	14.1304	1
36	RdRib25102017-036	38.7	27.68	18.27	11.77	6.06	3.01	0.72	49.67	11.8812	0
37	RdRib25102017-037	40.51	29.32	21.51	16.12	8.18	4.8	1.27	58.6797	15.5257	0
38	RdRib25102017-038	35.7	26.86	17.23	10.14	5.34	2.79	0.82	52.2472	15.3558	0
39	RdRib25102017-039	38.36	28.73	18.69	12.83	6.74	4.01	1.07	59.4955	15.8754	0
40	RdRib25102017-040	41.77	29.35	19.9	14.65	7.17	4.13	1.03	57.6011	14.3654	0
41	RdRib25102017-041	37.63	27.53	18.31	11.92	6.64	3.47	0.84	52.259	12.6506	0
42	RdRib25102017-042	37.93	26.45	18.01	11.44	6.06	3.34	0.92	55.1155	15.1815	0
43	RdRib25102017-043	35.57	26.54	17.85	10.46	5.26	2.83	0.73	53.8023	13.8783	0
44	RdRib25102017-044	35.6	26.14	18.03	10.82	5.81	3.13	0.7	53.8726	12.0482	0
45	RdRib25102017-045	41.51	28.84	19.26	13.95	7.37	4.32	1.18	58.616	16.0109	0
46	RdRib25102017-046	43.11	30.17	21.27	18.11	9.7	4.78	1.43	49.2784	14.7423	1
47	RdRib25102017-047	40.52	29.04	19.58	14.19	7.41	3.84	0.86	51.8219	11.6059	0
48	RdRib25102017-048	37.43	26.26	18.21	11.09	5.81	3.49	0.86	60.0688	14.8021	0
49	RdRib25102017-049	44.78	31.33	21.46	20.53	11.39	4.68	0.96	41.0887	8.42845	0
50	RdRib25102017-050	39.41	28.01	19.02	14.3	7.72	4.06	0.94	52.5907	12.1762	0
AVERAGE		39.248	28.3554	19.2796	13.5496	7.1136	3.7748	0.9232	53.6489	13.2424	0.12
STDEV		2.56836	1.5865	1.30119	2.7978	1.52437	0.647936	0.17275	5.63422	2.33614	0.328261
MAX		47.05	32.63	23.23	23.48	12.61	5.41	1.43	63.0952	17.4603
MIN		35.3	25.77	17.21	10.11	5.06	2.79	0.63	41.0887	7.43961

## Sheet: Barallobre (SP)
Species:	R. decussatus			Origin:	Barallobre, Spain				Reception date:		2017-10-24
Weight (Kg):	2	Number of clams:		179
							Reference:	RdBa24102017
Sampling date:	2017-10-25
Clam No.	Reference	Lenght (mm)	Height (mm)	Thickness (mm)	Total weight (g)	Empty shell weight (g)	Viscera weight (g)	Gonad weight (g)	Visceral index	Gonadal index	Perkinsus infection
1	RdBa24102017-001	38.08	28.16	19.46	13.74	7.29	3.44	0.85	47.1879	11.6598	0
2	RdBa24102017-002	39.5	26.69	18.77	12.57	6.73	3.69	0.84	54.8291	12.4814	0
3	RdBa24102017-003	38.97	27.9	18.47	12.63	6.72	3.4	0.75	50.5952	11.1607	1
4	RdBa24102017-004	39.22	28.47	17.96	11.97	6.24	3.13	0.53	50.1603	8.49359	0
5	RdBa24102017-005	36.62	25.66	16.29	9.24	4.58	2.62	0.46	57.2052	10.0437	1
6	RdBa24102017-006	41.35	27.99	20.16	14.82	7.66	3.91	1.02	51.0444	13.3159	1
7	RdBa24102017-007	36.73	26.41	17.23	10.33	5.24	2.45	0.41	46.7557	7.82443	1
8	RdBa24102017-008	39.59	27.92	18.13	11.99	6.7	2.74	0.65	40.8955	9.70149	2
9	RdBa24102017-009	36.92	26.17	17.83	10.47	5.29	2.88	0.6	54.4423	11.3422	1
10	RdBa24102017-010	36.93	26.91	17.73	10.42	5.42	2.67	0.52	49.262	9.5941	2
11	RdBa24102017-011	39.6	28.79	19.15	13.47	6.98	3.82	1.04	54.7278	14.8997	1
12	RdBa24102017-012	36.81	26.38	18.49	11.31	6.16	3.2	0.88	51.9481	14.2857	0
13	RdBa24102017-013	39.49	28.21	18.69	12.5	6.14	2.73	0.74	44.4625	12.0521	0
14	RdBa24102017-014	38.45	26.65	17.35	10.71	5.23	3.07	0.65	58.6998	12.4283	3
15	RdBa24102017-015	36.11	24.92	16.46	9.09	4.74	2.74	0.46	57.8059	9.70464	2
16	RdBa24102017-016	38.9	26.1	18.93	11.48	5.9	2.78	0.73	47.1186	12.3729	1
17	RdBa24102017-017	38.62	26.91	18.55	11.79	6.07	2.83	0.78	46.6227	12.8501	2
18	RdBa24102017-018	36.96	26.41	17.66	10.87	6.06	2.39	0.59	39.4389	9.73597	1
19	RdBa24102017-019	37.25	26.45	17.8	10.87	5.72	2.01	0.66	35.1399	11.5385	1
20	RdBa24102017-020	39.23	28.14	18.87	12.63	6.62	3.44	0.91	51.9637	13.7462	2
21	RdBa24102017-021	38.11	28.07	19.81	13.46	7.31	3.92	1.03	53.6252	14.0903	4
22	RdBa24102017-022	39.2	28.68	19.42	13.95	7.41	3.24	0.75	43.7247	10.1215	1
23	RdBa24102017-023	40.48	27.66	19.44	13.32	6.58	3.18	0.65	48.3283	9.87842	2
24	RdBa24102017-024	37.31	26.73	18.24	11.42	5.96	2.78	0.74	46.6443	12.4161	2
25	RdBa24102017-025	37.59	27.32	17.68	11.49	5.84	2.83	0.51	48.4589	8.73288	5
26	RdBa24102017-026	38.93	26.84	17.69	11.03	5.44	2.99	0.69	54.9632	12.6838	3
27	RdBa24102017-027	39.09	27.8	18.77	12.67	6.3	2.72	0.73	43.1746	11.5873	2
28	RdBa24102017-028	37.46	25.28	17.77	9.93	6.28	2.36	0.55	37.5796	8.75796	0
29	RdBa24102017-029	40.88	28.22	18.97	13.46	6.67	3.9	0.98	58.4708	14.6927	1
30	RdBa24102017-030	40.71	29.22	18.67	14.31	7.8	3.74	0.81	47.9487	10.3846	3
31	RdBa24102017-031	40.27	28.47	18.86	13.96	7.39	4.16	0.9	56.2923	12.1786	4
32	RdBa24102017-032	37.57	26.75	18.16	11.3	5.75	2.97	0.62	51.6522	10.7826	0
33	RdBa24102017-033	37.98	26.71	17.69	11.02	5.46	3.32	0.72	60.8059	13.1868	0
34	RdBa24102017-034	37.44	26.9	18.65	11.8	6.17	3.48	0.83	56.4019	13.4522	1
35	RdBa24102017-035	37.62	26.32	18.19	11.13	5.98	3.17	0.56	53.01	9.36455	0
36	RdBa24102017-036	36.76	27.07	17.75	11.09	5.76	2.74	0.63	47.5694	10.9375	1
37	RdBa24102017-037	36.06	26.11	16.78	9.96	5.37	2.63	0.58	48.9758	10.8007	5
38	RdBa24102017-038	39.66	27.01	18.95	12.42	6.29	3.33	0.62	52.9412	9.85692	0
39	RdBa24102017-039	39.71	29.83	19.32	14.46	8.11	3.22	0.75	39.7041	9.24784	0
40	RdBa24102017-040	38.57	27.72	19.35	12.83	6.59	3.68	0.91	55.8422	13.8088	1
41	RdBa24102017-041	39.57	27.56	19.9	13.38	5.48	3.6	1.01	65.6934	18.4307	1
42	RdBa24102017-042	39.06	27.36	18.9	12.68	6.75	3.48	0.85	51.5556	12.5926	0
43	RdBa24102017-043	39.74	27.93	18.77	12.41	6.07	3.35	0.83	55.1895	13.6738	1
44	RdBa24102017-044	38.21	26.8	17.79	11.14	5.52	3.35	0.75	60.6884	13.587	0
45	RdBa24102017-045	37.96	26.53	17.46	10.65	5.42	3.08	0.8	56.8266	14.7601	5
46	RdBa24102017-046	36.13	25.35	17.87	10.17	5.17	2.74	0.77	52.9981	14.8936	2
47	RdBa24102017-047	37.73	27.09	18.25	11.18	5.54	2.72	0.81	49.0975	14.6209	1
48	RdBa24102017-048	38.3	27.02	17.71	10.87	5.6	2.19	0.63	39.1071	11.25	1
49	RdBa24102017-049	36.56	26.8	18.03	10.8	5.71	2.55	0.72	44.6585	12.6095	5
50	RdBa24102017-050	38.84	27.89	17.66	11.95	6.17	3.3	0.94	53.4846	15.235	0
AVERAGE		38.3766	27.2056	18.3296	11.8628	6.1476	3.0932	0.7348	50.5144	11.9569	1.46
STDEV		1.33957	1.02112	0.849415	1.38165	0.788984	0.488381	0.158169	6.50796	2.17412	1.47372
MAX		41.35	29.83	20.16	14.82	8.11	4.16	1.04	65.6934	18.4307
MIN		36.06	24.92	16.29	9.09	4.58	2.01	0.41	35.1399	7.82443
											Perkinsus infection
											Stage	Number	%
											0	14	28
											1	18	36
											2	9	18
											3	3	6
											4	2	4
											5	4	8
											Total	50	100
											Perkinsus infection(%)	48.6667
											A.U.	73

## Sheet: Campelo, Ría de Pontevedra (SP)
Species:	R. decussatus			Origin:	Campelo, Ría de Pontevedra, Spain				Reception date:		2017-11-07
Weight (Kg):	2.156	Number of clams:		135
							Reference:	RdPo07112017
Sampling date:	2017-11-08
Clam No.	Reference	Lenght (mm)	Height (mm)	Thickness (mm)	Total weight (g)	Empty shell weight (g)	Viscera weight (g)	Gonad weight (g)	Visceral index	Gonadal index	Perkinsus infection
1	RdPo07112017-001	44.84	31.83	20.66	17.52	8.71	5.31	1.32	60.9644	15.155	4
2	RdPo07112017-002	44.45	33.04	21.59	20.1	10.74	5.03	1.42	46.8343	13.2216	3
3	RdPo07112017-003	42.5	30.37	20.25	16.52	8.67	4.01	0.96	46.2514	11.0727	3
4	RdPo07112017-004	46.03	32.82	20.82	18.77	9.44	5.3	1.69	56.1441	17.9025	0
5	RdPo07112017-005	42.87	31.72	21.09	17.16	8.21	4.71	1.24	57.3691	15.1035	5
6	RdPo07112017-006	46.37	33.15	21.24	19.65	10.01	6.04	1.83	60.3397	18.2817	5
7	RdPo07112017-007	42.98	30.68	20.13	15.9	8.37	4.53	1.17	54.1219	13.9785	0
8	RdPo07112017-008	40.7	29.6	18.05	12.92	6.84	3.43	0.95	50.1462	13.8889	0
9	RdPo07112017-009	43.01	30.6	20.18	15.87	7.88	4.83	1.33	61.2944	16.8782	5					Perkinsus infection
10	RdPo07112017-010	41.39	30.53	20.27	16.69	8.77	3.87	1	44.1277	11.4025	3					Stage	Number	%
11	RdPo07112017-011	42.43	30.5	20.27	17.44	9.48	4.07	1.07	42.9325	11.2869	4					0	13	26
12	RdPo07112017-012	40.9	28.9	18.31	13.3	6.91	3.54	0.9	51.2301	13.0246	0					1	6	12
13	RdPo07112017-013	46.04	31.69	21.44	19.01	9.68	4.71	1.23	48.657	12.7066	5					2	8	16
14	RdPo07112017-014	42.55	29.93	19.48	14.74	7.26	4.86	1.3	66.9421	17.9063	4					3	9	18
15	RdPo07112017-015	42.46	29.73	19.72	15.89	8.39	4.39	1.19	52.3242	14.1836	0					4	5	10
16	RdPo07112017-016	41.85	31.07	20.36	16	7.97	4.4	1.11	55.207	13.9272	0					5	9	18
17	RdPo07112017-017	42.29	31.61	21.15	18.01	9.08	4.05	1.36	44.6035	14.978	5					Total	50	100
18	RdPo07112017-018	43.8	31.81	21.09	18.4	9.71	5.45	1.45	56.1277	14.9331	2					Perkinsus infection(%)	76
19	RdPo07112017-019	42.32	29.86	19.88	21.27	8.23	4.86	1.33	59.0522	16.1604	3					A.U.	114
20	RdPo07112017-020	41.96	29.3	19.3	14.67	7.35	3.83	1.09	52.1088	14.8299	1
21	RdPo07112017-021	44.26	31.78	20.9	17.67	8.53	4.35	1.25	50.9965	14.6542	5
22	RdPo07112017-022	41.38	29.28	18.77	14.09	7.32	3.93	1.03	53.6885	14.071	2
23	RdPo07112017-023	46.66	31.94	20.13	18.37	9.11	4.77	1.16	52.36	12.7333	2
24	RdPo07112017-024	43.89	31	19.32	15.78	7.59	4.61	1.38	60.7378	18.1818	3
25	RdPo07112017-025	44.73	30.6	19.41	15.83	7.73	4.67	1.32	60.414	17.0763	3
26	RdPo07112017-026	42.6	28.95	18.84	21.09	6.72	4.01	0.99	59.6726	14.7321	2
27	RdPo07112017-027	42.95	30.85	19.16	15.56	7.98	4.17	1.25	52.2556	15.6642	3
28	RdPo07112017-028	43.02	28.9	19.67	15.56	7.85	4.35	1.48	55.414	18.8535	1
29	RdPo07112017-029	41.61	29.16	19.21	14.48	7.82	3.4	0.83	43.4783	10.6138	0
30	RdPo07112017-030	40.97	29.25	19.23	14.22	7.32	3.92	0.92	53.5519	12.5683	2
31	RdPo07112017-031	43.14	30.78	20.11	17.29	8.9	5.35	1.31	60.1124	14.7191	4
32	RdPo07112017-032	40.92	30.05	20.29	16.13	8.75	3.73	0.91	42.6286	10.4	3
33	RdPo07112017-033	43.08	30.59	20.77	17.74	9.51	4.81	1.02	50.5783	10.7256	0
34	RdPo07112017-034	45.59	31.74	19.55	17.06	8.23	4.22	1.82	51.2758	22.1142	0
35	RdPo07112017-035	47.44	32.88	20.49	19.33	9.6	5.31	1.42	55.3125	14.7917	1
36	RdPo07112017-036	42.34	30.47	20.28	15.92	7.95	4.78	1.29	60.1258	16.2264	2
37	RdPo07112017-037	46.11	32.62	20.28	18.46	8.79	4.54	1.31	51.6496	14.9033	0
38	RdPo07112017-038	44.84	32.63	19.82	18.17	9.38	4.88	1.16	52.0256	12.3667	5
39	RdPo07112017-039	44.51	31.92	19.67	17.07	8.68	4.62	1.26	53.2258	14.5161	0
40	RdPo07112017-040	45.75	31.84	21.3	19.75	10.09	5.55	1.3	55.005	12.884	0
41	RdPo07112017-041	40.15	27.37	18.53	12.11	6.28	2.98	0.81	47.4522	12.8981	5
42	RdPo07112017-042	44.92	31.65	20.96	19.05	10.4	5.02	1.32	48.2692	12.6923	0
43	RdPo07112017-043	41.64	29.32	20.03	14.42	6.81	3.01	1	44.1997	14.6843	4
44	RdPo07112017-044	43.43	30.23	20.6	25.56	8.83	4.45	1.28	50.3964	14.496	1
45	RdPo07112017-045	38.49	26.6	18.74	12.04	6.32	3.28	0.98	51.8987	15.5063	1
46	RdPo07112017-046	43.24	29.92	18.87	14.43	7.03	3.73	0.99	53.0583	14.0825	2
47	RdPo07112017-047	43.36	30.33	19.87	20.45	9.09	4.22	1.1	46.4246	12.1012	2
48	RdPo07112017-048	41.41	29.85	20.55	15.78	8.01	4.19	1.08	52.3096	13.4831	3
49	RdPo07112017-049	42.66	28.84	19.6	14.79	7.23	3.91	1.11	54.0802	15.3527	5
50	RdPo07112017-050	41.48	30	19.55	15.87	8.42	3.74	0.99	44.4181	11.7577	1
AVERAGE		43.1662	30.6016	19.9956	16.878	8.3594	4.3944	1.2002	52.6759	14.4134	2.28
STDEV		1.87529	1.41646	0.850942	2.54408	1.07153	0.672553	0.226837	5.6622	2.35122	1.82991
MAX		47.44	33.15	21.59	25.56	10.74	6.04	1.83	66.9421	22.1142
MIN		38.49	26.6	18.05	12.04	6.28	2.98	0.81	42.6286	10.4

## Sheet: Cangas, Ría de Vigo (SP)
Species:	R. decussatus			Origin:	Cangas, Ría de Vigo, Spain				Reception date:		2018-02-06
Weight (Kg):	2.053	Number of clams:		125
							Reference:	RdCg06022018
Sampling date:	2018-02-07
Clam No.	Reference	Lenght (mm)	Height (mm)	Thickness (mm)	Total weight (g)	Empty shell weight (g)	Viscera weight (g)	Gonad weight (g)	Visceral index	Gonadal index	Perkinsus infection
1	RdCg06022018-001	40.07	29.34	18.53	13.19	6.66	2.64	0.67	39.6396	10.0601	0
2	RdCg06022018-002	43.69	30.59	20.79	17.83	9.52	4.18	0.73	43.9076	7.66807	0
3	RdCg06022018-003	43.18	30.56	21.77	17.89	8.53	4.37	0.74	51.2309	8.67526	1
4	RdCg06022018-004	42.93	32.05	21.39	16.46	7.63	5.04	0.69	66.055	9.04325	0
5	RdCg06022018-005	39.24	29.72	20.6	15.91	8.6	3.7	0.74	43.0233	8.60465	5
6	RdCg06022018-006	41.35	30.28	19.91	15.37	7.75	5.02	0.63	64.7742	8.12903	0
7	RdCg06022018-007	42.45	30.79	21.49	19.04	10.83	3.29	0.52	30.3786	4.80148	4
8	RdCg06022018-008	42.92	31.78	21.21	18.4	9.75	4.06	0.55	41.641	5.64103	0
9	RdCg06022018-009	44.91	31.77	20.76	18.53	9.23	5.06	0.94	54.8212	10.1842	2					Perkinsus infection
10	RdCg06022018-010	41.82	28.98	18.84	14.1	7.1	3.77	0.61	53.0986	8.59155	1					Stage	Number	%
11	RdCg06022018-011	42.07	30.6	19.78	15.85	7.93	4.68	0.55	59.0164	6.93569	0					0	25	50
12	RdCg06022018-012	42.76	30.61	20.46	16.03	7.83	4.07	0.8	51.9796	10.2171	0					1	7	14
13	RdCg06022018-013	43.33	29.79	21.04	17	8.4	3.46	1.07	41.1905	12.7381	0					2	5	10
14	RdCg06022018-014	43.55	30.42	19.84	16.37	8.38	4.63	0.99	55.2506	11.8138	5					3	4	8
15	RdCg06022018-015	41.86	29.7	19.18	14.88	7.42	4.17	0.94	56.1995	12.6685	5					4	3	6
16	RdCg06022018-016	40.69	29.27	20.65	15.49	4.29	2.88	0.5	67.1329	11.655	2					5	6	12
17	RdCg06022018-017	41.07	28.91	19.58	15.42	8.33	2.88	0.43	34.5738	5.16206	0					Total	50	100
18	RdCg06022018-018	42.6	28.35	20.56	16.18	7.78	3.21	1.3	41.2596	16.7095	0					Perkinsus infection(%)	47.3333
19	RdCg06022018-019	40.46	31.32	21.14	18.17	9.73	3.29	0.74	33.8129	7.60534	3					A.U.	71
20	RdCg06022018-020	41.66	28.47	19.43	14.62	7.05	3.01	0.45	42.695	6.38298	1
21	RdCg06022018-021	42.92	30.06	19.92	16.99	8.75	2.85	0.61	32.5714	6.97143	0
22	RdCg06022018-022	42.98	31.91	20.47	18.12	9.49	3.44	0.66	36.2487	6.95469	0
23	RdCg06022018-023	44.71	31.91	22.44	20.44	10.47	5.01	1.1	47.851	10.5062	4
24	RdCg06022018-024	39.59	28.53	20.19	14.38	7.57	2.66	0.44	35.1387	5.81242	0
25	RdCg06022018-025	42.66	29.75	20.47	16.42	8.2	4.11	0.66	50.122	8.04878	5
26	RdCg06022018-026	41.25	30.27	18.88	14.17	6.95	3.3	0.73	47.482	10.5036	1
27	RdCg06022018-027	43.61	31.13	19.62	16.37	8.02	3.73	0.81	46.5087	10.0998	0
28	RdCg06022018-028	44.77	31.89	21.42	19	9.06	5.71	1.34	63.0243	14.7903	4
29	RdCg06022018-029	41.74	29.73	20.02	16.42	8.55	3.6	0.65	42.1053	7.60234	2
30	RdCg06022018-030	44.83	31.45	21.37	18.92	9.48	4.8	1.03	50.6329	10.865	1
31	RdCg06022018-031	41.2	31.57	22.13	19.72	10.35	3.96	0.69	38.2609	6.66667	3
32	RdCg06022018-032	41.97	31.23	21.22	17.19	9.26	3.4	0.77	36.7171	8.31533	2
33	RdCg06022018-033	41.83	30.43	20.12	16	7.76	4.18	0.87	53.866	11.2113	1
34	RdCg06022018-034	43.43	29.75	21.06	17.66	9.02	4.85	1.07	53.7694	11.8625	3
35	RdCg06022018-035	39.94	28.94	20.38	15.07	7.29	3.73	1.04	51.166	14.2661	0
36	RdCg06022018-036	41.88	28.83	19.81	15.79	8.56	3.16	0.7	36.9159	8.17757	5
37	RdCg06022018-037	41.69	29.78	20.06	15.51	8.12	3.01	0.74	37.069	9.1133	0
38	RdCg06022018-038	45.31	30.64	21.58	19.85	9.8	3.23	0.81	32.9592	8.26531	3
39	RdCg06022018-039	43.59	30.11	21	17.98	9.17	3.91	0.9	42.639	9.81461	5
40	RdCg06022018-040	42.67	29.4	21.48	17.27	8.8	4.1	0.82	46.5909	9.31818	0
41	RdCg06022018-041	42.98	30.4	21.04	17.13	8.85	4.23	0.91	47.7966	10.2825	0
42	RdCg06022018-042	38.38	29.39	18.84	14.24	7.41	2.74	0.56	36.9771	7.55735	0
43	RdCg06022018-043	42.43	30.16	19.12	15.51	7.94	2.4	0.7	30.2267	8.81612	0
44	RdCg06022018-044	42.2	30.24	22	18.89	10.01	3.7	0.81	36.963	8.09191	2
45	RdCg06022018-045	44.68	30.85	21.32	17.89	8.47	3.89	1.01	45.9268	11.9244	0
46	RdCg06022018-046	40.15	31.13	21.1	17.82	9.25	4.85	1.15	52.4324	12.4324	0
47	RdCg06022018-047	43.02	29.87	20.03	17.1	8.8	3.64	0.94	41.3636	10.6818	0
48	RdCg06022018-048	38.33	28.66	18.16	12.35	6.08	2.98	0.67	49.0132	11.0197	0
49	RdCg06022018-049	41.95	30.82	20.9	15.73	8.76	3.85	0.86	43.9498	9.81735	0
50	RdCg06022018-050	43.06	31.26	21.23	18.72	10.04	4.03	0.92	40.1394	9.16335	1
AVERAGE		42.2472	30.2678	20.4866	16.7076	8.4604	3.8092	0.7912	45.5622	9.44478	1.42
STDEV		1.62509	1.01279	0.981368	1.78209	1.1979	0.760668	0.211753	9.3696	2.47813	1.80803
MAX		45.31	32.05	22.44	20.44	10.83	5.71	1.34	67.1329	16.7095
MIN		38.33	28.35	18.16	12.35	4.29	2.4	0.43	30.2267	4.80148

## Sheet: Ria de Aveiro (PT)
Species:	R. decussatus			Origin:	Riad de Aveiro, Portugal				Reception date:		2017-11-30
Weight (Kg):	2	Number of clams:
							Reference:	RdAv30112017
Sampling date:	2017-12-07
Clam No.	Reference	Lenght (mm)	Height (mm)	Thickness (mm)	Total weight (g)	Empty shell weight (g)	Viscera weight (g)	Gonad weight (g)	Visceral index	Gonadal index	Perkinsus infection
1	RdAv30112017-001	43.19	31.58	19.95	18.23	10.06	5.08	1.53	50.497	15.2087	0
2	RdAv30112017-002	46.98	34.34	21.89	22.05	11.46	6.65	1.74	58.0279	15.1832	0
3	RdAv30112017-003	46.72	34	21.31	21.02	11.11	6.01	1.81	54.0954	16.2916	1
4	RdAv30112017-004	46.83	34.59	20.99	21.07	10.6	6.48	1.91	61.1321	18.0189	0
5	RdAv30112017-005	44.97	31.52	19.77	17.77	9.03	5.35	1.53	59.247	16.9435	0
6	RdAv30112017-006	45.33	33.5	20.02	18.47	9.51	5.19	1.42	54.5741	14.9317	0
7	RdAv30112017-007	47.28	34.32	21.4	21.44	10.5	6.46	1.78	61.5238	16.9524	0
8	RdAv30112017-008	40.28	30.68	19.86	15.69	7.86	5.4	1.67	68.7023	21.2468	0
9	RdAv30112017-009	42.81	31.3	20.48	17.62	9.18	5.03	1.25	54.793	13.6166	0
10	RdAv30112017-010	43.16	32.06	19.54	17.21	9.28	4.56	1.14	49.1379	12.2845	0
11	RdAv30112017-011	48.69	34.04	21.8	21.91	11.1	6.53	1.83	58.8288	16.4865	0
12	RdAv30112017-012	46.15	33.61	21.2	20.57	10.57	5.87	1.56	55.5345	14.7588	0					Perkinsus infection
13	RdAv30112017-013	43.41	31.04	20.17	17.3	9.15	5.44	1.55	59.4536	16.9399	0					Stage	Number	%
14	RdAv30112017-014	43.79	32.96	21.75	19.22	10.03	5.27	1.37	52.5424	13.659	0					0	49	98
15	RdAv30112017-015	43.74	33.54	21.26	19.1	9.67	5.47	1.51	56.5667	15.6153	0					1	1	2
16	RdAv30112017-016	44.34	32.14	21.19	18.34	9.14	5.35	1.5	58.5339	16.4114	0					2	0	0
17	RdAv30112017-017	45.85	35.11	21.34	20.54	10.83	5.66	1.38	52.2622	12.7424	0					3	0	0
18	RdAv30112017-018	45.91	34.13	22.02	21	10.44	5.54	1.75	53.0651	16.7625	0					4	0	0
19	RdAv30112017-019	47.01	33.92	21.36	21.52	11.2	5.83	1.62	52.0536	14.4643	0					5	0	0
20	RdAv30112017-020	39.17	29.34	19.04	13.99	7.38	3.99	1.1	54.065	14.9051	0					Total	50	100
21	RdAv30112017-021	50.53	35.85	21.59	23.58	11.81	6.52	1.71	55.2075	14.4793	0					Perkinsus infection(%)	0.666667
22	RdAv30112017-022	40.54	30.46	18.59	14.77	8.5	5.21	1.04	61.2941	12.2353	0					A.U.	1
23	RdAv30112017-023	47.16	35.44	21.41	22.09	11.78	6.43	1.7	54.584	14.4312	0
24	RdAv30112017-024	48.19	34.85	21.52	22.99	12.98	6.3	1.15	48.5362	8.85978	0
25	RdAv30112017-025	44.17	32.99	21.64	19.34	9.84	5.11	1.64	51.9309	16.6667	0
26	RdAv30112017-026	42.23	31.07	19.81	15.93	7.87	4.55	1.26	57.8145	16.0102	0
27	RdAv30112017-027	41.53	32.19	18.69	15.8	8.25	3.52	0.9	42.6667	10.9091	0
28	RdAv30112017-028	45.5	33.93	21.02	19.99	10.17	5.06	1.15	49.7542	11.3078	0
29	RdAv30112017-029	46.42	32.56	21.97	20.87	11.01	4.45	1.31	40.4178	11.8983	0
30	RdAv30112017-030	42.46	32.17	21.42	18.96	9.4	5.21	1.47	55.4255	15.6383	0
31	RdAv30112017-031	44.45	31.95	20.8	19.39	10.07	5.13	1.61	50.9434	15.9881	0
32	RdAv30112017-032	44.95	32.52	18.72	16.79	8.71	4.74	1.17	54.4202	13.4328	0
33	RdAv30112017-033	47.52	35.78	22.21	22.83	11.63	6.18	1.84	53.1384	15.8212	0
34	RdAv30112017-034	46.16	34.25	21.21	20.45	10.35	5.94	1.91	57.3913	18.4541	0
35	RdAv30112017-035	48.74	36.09	21.44	23.24	11.6	6.38	1.9	55	16.3793	0
36	RdAv30112017-036	46.42	34.81	22.2	21.85	11.09	6.14	1.57	55.3652	14.1569	0
37	RdAv30112017-037	45.72	35.07	21.26	20.79	10.71	6.27	1.8	58.5434	16.8067	0
38	RdAv30112017-038	48.88	34.7	22.15	23.05	11.12	6.84	2.41	61.5108	21.6727	0
39	RdAv30112017-039	47.44	34.59	21.91	23.53	12.42	6.23	1.82	50.161	14.6538	0
40	RdAv30112017-040	47.15	33.65	21.96	21.58	11.11	5.94	1.59	53.4653	14.3114	0
41	RdAv30112017-041	43.18	31.88	20.41	17.58	9.18	5.11	1.36	55.6645	14.8148	0
42	RdAv30112017-042	47.31	34.42	21.15	20.64	10.37	6.55	2.06	63.163	19.865	0
43	RdAv30112017-043	45.88	34.73	20.95	20.28	10.31	5.56	1.16	53.9282	11.2512	0
44	RdAv30112017-044	46.33	33.2	21.53	20.19	10.48	5.92	1.78	56.4885	16.9847	0
45	RdAv30112017-045	47.15	35.46	21.77	20.61	10.14	5.72	1.47	56.4103	14.497	0
46	RdAv30112017-046	46.24	33.89	20.98	21.44	10.69	6	1.67	56.1272	15.6221	0
47	RdAv30112017-047	45.63	32.98	20.54	18.89	9.85	5.32	1.49	54.0102	15.1269	0
48	RdAv30112017-048	47.59	35.45	22.31	22.87	11.57	5.24	1.31	45.2895	11.3224	0
49	RdAv30112017-049	43.23	31.03	20.12	16.98	9.22	4.13	1.13	44.7939	12.256	0
50	RdAv30112017-050	44.1	32.26	20.56	16.91	8.3	4.5	1.32	54.2169	15.9036	0
AVERAGE		45.3682	33.3588	20.9636	19.7654	10.1726	5.5472	1.533	54.646	15.1036	0.02
STDEV		2.37339	1.6148	0.968472	2.42416	1.22059	0.753503	0.297399	5.13705	2.50027	0.141421
MAX		50.53	36.09	22.31	23.58	12.98	6.84	2.41	68.7023	21.6727
MIN		39.17	29.34	18.59	13.99	7.38	3.52	0.9	40.4178	8.85978

## Sheet: Lagoa de Óbidos, Portugal
Species:	R. decussatus			Origin:	Lagoa de Obidos, Portugal				Reception date:		2017-12-07
Weight (Kg):	2.057	Number of clams:		169
							Reference:	RdOb07122017
Sampling date:	2017-12-13
Clam No.	Reference	Lenght (mm)	Height (mm)	Thickness (mm)	Total weight (g)	Empty shell weight (g)	Viscera weight (g)	Gonad weight (g)	Visceral index	Gonadal index	Perkinsus infection
1	RdOb07122017-001	46.04	31.43	21.34	21.12	10.57	4.21	0.92	39.8297	8.70388	2
2	RdOb07122017-002	42.1	29.05	19.84	15.97	8.23	3.31	0.61	40.2187	7.41191	2
3	RdOb07122017-003	38.24	26.82	17.55	10.69	5.27	2.7	0.57	51.2334	10.8159	1
4	RdOb07122017-004	37.29	26.63	17.52	10.74	5.68	2.71	0.63	47.7113	11.0915	5					Perkinsus infection
5	RdOb07122017-005	43.77	31.05	20.39	17.56	9.43	3.71	0.71	39.3425	7.52916	1					Stage	Number	%
6	RdOb07122017-006	42.98	29.91	19.93	15.53	7.51	4.05	0.72	53.9281	9.58722	5					0	5	10
7	RdOb07122017-007	40.55	27.85	19.11	12.97	6.28	3.08	0.61	49.0446	9.71338	1					1	7	14
8	RdOb07122017-008	39.51	28.14	19.05	13.74	7.36	2.99	0.62	40.625	8.42391	2					2	13	26
9	RdOb07122017-009	41.54	29	19.97	14.85	7.46	3.78	0.93	50.6702	12.4665	0					3	8	16
10	RdOb07122017-010	40.84	28.02	19.32	13.47	6.5	3.4	0.63	52.3077	9.69231	3					4	3	6
11	RdOb07122017-011	39.23	28.26	18.54	12.42	6.02	3.12	0.64	51.8272	10.6312	2					5	14	28
12	RdOb07122017-012	38.76	26.13	17.57	12.05	6.43	3.06	0.74	47.5894	11.5086	4					Total	50	100
13	RdOb07122017-013	42.83	31.13	21.72	18.33	9.85	3.33	0.78	33.8071	7.91878	5					Perkinsus infection(%)	92.6667
14	RdOb07122017-014	41.35	29.13	19.87	15.58	8.06	3.68	0.86	45.6576	10.67	2					A.U.	139
15	RdOb07122017-015	39.6	28.74	18.6	13.44	7.77	2.65	0.5	34.1055	6.43501	3
16	RdOb07122017-016	38.94	27.65	17.42	11.58	5.94	2.93	0.57	49.3266	9.59596	5
17	RdOb07122017-017	36.11	26.45	17.13	10.23	5.21	2.33	0.39	44.7217	7.4856	4
18	RdOb07122017-018	38.33	26.2	16.44	9.93	5.17	2.43	0.64	47.0019	12.3791	1
19	RdOb07122017-019	37.68	26.01	17	10.61	5.57	2.47	0.5	44.3447	8.97666	0
20	RdOb07122017-020	38.2	26.51	17.39	10.67	5.3	2.47	0.46	46.6038	8.67925	3
21	RdOb07122017-021	40.45	29.68	20.25	15.98	8.64	2.41	0.45	27.8935	5.20833	5
22	RdOb07122017-022	39.64	28.61	29.31	14.78	7.99	3.69	0.52	46.1827	6.50814	5
23	RdOb07122017-023	41.36	30.12	20.23	15.71	8.28	3.37	0.62	40.7005	7.48792	5
24	RdOb07122017-024	40.39	28.7	19.36	14.27	7.32	3.1	0.52	42.3497	7.10383	3
25	RdOb07122017-025	42.58	30.18	20.22	16.9	8.95	3.89	0.83	43.4637	9.27374	3
26	RdOb07122017-026	35.21	25.82	18.19	11.26	6.1	2.06	0.5	33.7705	8.19672	5
27	RdOb07122017-027	42.52	29.71	19.29	14.52	7.29	3.55	0.79	48.6968	10.8368	3
28	RdOb07122017-028	38.7	27.52	17.21	10.95	5.08	2.17	0.41	42.7165	8.07087	1
29	RdOb07122017-029	41.43	29.49	19.09	14.74	7.83	3.2	0.71	40.8685	9.06769	0
30	RdOb07122017-030	42.22	30.17	19.93	15.99	8.26	3.92	0.76	47.4576	9.20097	2
31	RdOb07122017-031	40.74	29.96	19.94	15.5	8.31	2.29	0.46	27.5572	5.5355	2
32	RdOb07122017-032	39.38	27.58	18.86	12.9	6.53	3.04	0.75	46.5544	11.4855	0
33	RdOb07122017-033	38.82	26.64	16.81	9.77	4.85	2.27	0.51	46.8041	10.5155	0
34	RdOb07122017-034	36.46	28.49	18.09	11.83	7.12	1.96	0.37	27.5281	5.19663	5
35	RdOb07122017-035	38.75	27.61	18.63	13.09	7.04	2.08	0.35	29.5455	4.97159	5
36	RdOb07122017-036	38.43	26.22	17.69	10.87	5.89	2.25	0.31	38.2003	5.26316	5
37	RdOb07122017-037	38.88	27.06	18.17	11.46	5.62	2.38	0.37	42.3488	6.58363	3
38	RdOb07122017-038	38.13	27.69	18.8	12.1	6.08	2.71	0.57	44.5724	9.375	2
39	RdOb07122017-039	38.09	27.03	18.47	11.76	6.14	2.66	0.5	43.3225	8.14332	5
40	RdOb07122017-040	40.1	29.07	19.13	13.67	7.95	3.49	0.7	43.8994	8.80503	2
41	RdOb07122017-041	45.21	30.41	21.04	19.18	10.54	3.58	0.64	33.9658	6.07211	3
42	RdOb07122017-042	40.38	29	20	16.01	9.36	2.98	0.69	31.8376	7.37179	2
43	RdOb07122017-043	39.56	27.82	18.81	12.72	6.49	3.13	0.63	48.228	9.70724	5
44	RdOb07122017-044	38.79	28.14	18.62	12.91	7.01	2.48	0.44	35.378	6.27675	2
45	RdOb07122017-045	42	30	21.51	17.31	9.88	3.27	0.95	33.0972	9.61538	1
46	RdOb07122017-046	37.31	26.94	18.24	11.83	6.39	2.12	0.4	33.1768	6.25978	5
47	RdOb07122017-047	42.27	31.6	20.61	17.84	9.51	4.36	1.07	45.8465	11.2513	1
48	RdOb07122017-048	43.03	30.32	19.48	16.33	8.84	3.82	0.87	43.2127	9.84163	2
49	RdOb07122017-049	39.64	27.38	17.71	10.87	5.89	2.17	0.33	36.8421	5.60272	4
50	RdOb07122017-050	39.21	27.93	17.64	11.7	5.98	2.91	0.49	48.6622	8.19398	2
AVERAGE		40.0714	28.42	19.1406	13.7246	7.2154	2.9944	0.6108	42.0915	8.53477	2.78
STDEV		2.24559	1.56112	1.95261	2.67494	1.53157	0.634627	0.17798	6.98976	2.00671	1.70581
MAX		46.04	31.6	29.31	21.12	10.57	4.36	1.07	53.9281	12.4665
MIN		35.21	25.82	16.44	9.77	4.85	1.96	0.31	27.5281	4.97159

## Sheet: Ria Formosa, Algarve (PT)
Species:	R. decussatus			Origin:	Ria Formosa, Algarve, Portugal				Reception date:		2017-10-25
Weight (Kg):	2	Number of clams:		142
							Reference:	RdAl25102017
Sampling date:	2017-10-26
Clam No.	Reference	Lenght (mm)	Height (mm)	Thickness (mm)	Total weight (g)	Empty shell weight (g)	Viscera weight (g)	Gonad weight (g)	Visceral index	Gonadal index	Perkinsus infection
1	RdAl25102017-001	41.7	30.37	20.75	15.76	8.24	3.36	0.56	40.7767	6.79612	5
2	RdAl25102017-002	39.45	29.72	19.37	13.57	7.12	2.86	0.51	40.1685	7.16292	3
3	RdAl25102017-003	39.79	28.08	17.63	11.82	5.87	3.07	0.46	52.2998	7.83646	5
4	RdAl25102017-004	41.44	29.54	18.78	14.25	7.03	3.36	0.6	47.7952	8.53485	2
5	RdAl25102017-005	42.46	29.65	19.23	14.79	7.27	3.54	0.71	48.6933	9.76616	2
6	RdAl25102017-006	40.98	27.57	19.08	12.05	6.57	3.65	0.99	55.5556	15.0685	0
7	RdAl25102017-007	38.44	27.15	18.37	11.52	5.57	3.11	0.54	55.8348	9.69479	1
8	RdAl25102017-008	45.43	31.84	21.08	19.08	9.61	4.29	0.79	44.641	8.2206	4					Perkinsus infection
9	RdAl25102017-009	39.99	27.83	18.5	13.06	6.38	3.02	0.42	47.3354	6.58307	1					Stage	Number	%
10	RdAl25102017-010	43.2	30.81	20.2	17.03	9.25	5.01	1.25	54.1622	13.5135	1					0	11	22
11	RdAl25102017-011	40.95	29.98	20.65	14.49	9.12	3.34	0.72	36.6228	7.89474	3					1	7	14
12	RdAl25102017-012	43.66	32.03	21.57	19.27	9.6	4.09	0.76	42.6042	7.91667	1					2	10	20
13	RdAl25102017-013	39.87	29.36	19.27	14.28	7.34	3.45	0.76	47.0027	10.3542	0					3	9	18
14	RdAl25102017-014	38.65	28.88	19.02	12.93	6.36	3.13	0.6	49.2138	9.43396	4					4	7	14
15	RdAl25102017-015	42.36	30.69	20.52	16.62	8.08	4.5	0.94	55.6931	11.6337	2					5	6	12
16	RdAl25102017-016	40.43	29.05	18.75	13.4	6.6	3.36	0.89	50.9091	13.4848	4					Total	50	100
17	RdAl25102017-017	46.015	32.42	21.71	21.54	12.01	4.42	1.21	36.8027	10.0749	0					Perkinsus infection(%)	74.6667
18	RdAl25102017-018	40.7	28.58	18.55	13.77	6.84	2.82	0.71	41.2281	10.3801	0					A.U.	112
19	RdAl25102017-019	46.03	31.35	21.35	18.43	10.21	3.03	0.72	29.6768	7.05191	2
20	RdAl25102017-020	36.93	25.68	17.76	10.4	5.2	2.45	0.77	47.1154	14.8077	0
21	RdAl25102017-021	40.95	29.41	19.12	14.15	6.88	2.36	0.56	34.3023	8.13953	2
22	RdAl25102017-022	43.16	30.54	20.7	17.44	9.1	3.03	0.52	33.2967	5.71429	3
23	RdAl25102017-023	44.12	30.64	22.13	18.81	10.31	2.54	0.55	24.6363	5.33463	3
24	RdAl25102017-024	41.71	30.59	20.36	15.13	7.68	2.6	0.53	33.8542	6.90104	1
25	RdAl25102017-025	41.88	29.73	19.77	13.84	7.2	3.81	0.74	52.9167	10.2778	1
26	RdAl25102017-026	36.1	26.85	18.77	11.9	6.72	2.78	0.77	41.369	11.4583	0
27	RdAl25102017-027	39.51	28.92	18.01	12.6	6.57	2.77	0.57	42.1613	8.6758	3
28	RdAl25102017-028	38.77	29.12	19.25	12.72	6.77	2.53	0.5	37.3708	7.38552	4
29	RdAl25102017-029	41.5	29.21	19.4	13.64	6.67	3.09	0.69	46.3268	10.3448	0
30	RdAl25102017-030	37.59	26.73	19.21	13.05	7.35	2.43	0.51	33.0612	6.93878	5
31	RdAl25102017-031	38.01	27.26	18.82	12.47	6.08	3.6	0.79	59.2105	12.9934	2
32	RdAl25102017-032	38.13	27.47	18.46	12.18	6.43	2.71	0.62	42.1462	9.6423	2
33	RdAl25102017-033	40.44	28.11	19.56	13.21	6.6	2.53	0.37	38.3333	5.60606	1
34	RdAl25102017-034	38.08	27.85	19.61	12.91	6.77	3.49	0.68	51.551	10.0443	4
35	RdAl25102017-035	37.45	27.17	18.57	10.78	5.88	2.34	0.41	39.7959	6.97279	2
36	RdAl25102017-036	40.34	28.05	19.61	14.44	7.39	3.06	0.6	41.4073	8.11908	3
37	RdAl25102017-037	38.43	27.29	16.97	10.27	4.93	2.47	0.49	50.1014	9.93915	5
38	RdAl25102017-038	41.38	28.37	18.98	13.62	6.97	3.23	0.58	46.3415	8.32138	2
39	RdAl25102017-039	42.74	29.95	20.48	16.75	8.3	3.46	0.74	41.6867	8.91566	4
40	RdAl25102017-040	41.44	30.19	21.28	16.88	8.92	4.57	1.25	51.2332	14.0135	0
41	RdAl25102017-041	40.29	30.04	20.2	15.07	8.27	3.74	0.88	45.2237	10.6409	0
42	RdAl25102017-042	41.36	30.27	22.04	16.72	9.07	5.27	1.33	58.1036	14.6637	5
43	RdAl25102017-043	40.78	29.91	20.26	14.62	7.43	3.82	0.72	51.4132	9.69044	4
44	RdAl25102017-044	42.25	30.97	20.24	17.17	8.96	3.2	0.63	35.7143	7.03125	3
45	RdAl25102017-045	44.48	31.51	20.59	17.11	8.77	3.16	0.77	36.0319	8.77993	3
46	RdAl25102017-046	37.85	28.65	18.45	11.45	6.32	2.54	0.71	40.1899	11.2342	2
47	RdAl25102017-047	44.84	31.32	21.38	18.23	9.27	3.89	0.85	41.9633	9.16936	5
48	RdAl25102017-048	39.81	28.63	18.61	13.73	7.06	3.09	0.51	43.7677	7.2238	3
49	RdAl25102017-049	39.77	27.34	19.5	13.64	6.93	3.19	0.49	46.0317	7.07071	0
50	RdAl25102017-050	41.19	27.95	18.33	12.43	6.34	3.45	0.72	54.4164	11.3565	0
AVERAGE		40.8565	29.2124	19.616	14.5004	7.5242	3.2922	0.6998	44.3618	9.37617	2.24
STDEV		2.3501	1.56589	1.20947	2.54335	1.45285	0.682691	0.217832	7.79391	2.48374	1.68499
MAX		46.03	32.42	22.13	21.54	12.01	5.27	1.33	59.2105	15.0685
MIN		36.1	25.68	16.97	10.27	4.93	2.34	0.37	24.6363	5.33463

## Sheet: Venice Lagoon, Italy
Species:	R. decussatus			Origin:	Venice Lagoon, Italy				Reception date:		2017-12-16
Weight (Kg):	2.986	Number of clams:		218
							Reference:	RdVe16122017
Sampling date:	2017-12-22
Clam No.	Reference	Lenght (mm)	Height (mm)	Thickness (mm)	Total weight (g)	Empty shell weight (g)	Viscera weight (g)	Gonad weight (g)	Visceral index	Gonadal index	Perkinsus infection
1	RdVe16122017-001	47.35	31.31	20.79	18.68	9.48	4.11	0.93	43.3544	9.81013	3
2	RdVe16122017-002	43.57	28.67	21.18	17.65	9.18	4.25	0.73	46.2963	7.95207	4
3	RdVe16122017-003	41.46	29.51	19.21	14.39	7.34	3.55	0.76	48.3651	10.3542	3
4	RdVe16122017-004	42.49	27.82	18.66	13.99	6.71	3.89	0.75	57.9732	11.1773	2
5	RdVe16122017-005	41.86	27.6	19.75	14.32	7.12	3.86	0.93	54.2135	13.0618	2
6	RdVe16122017-006	40.71	26.93	19.65	13.85	7.1	3.63	0.86	51.1268	12.1127	2
7	RdVe16122017-007	43.5	29.57	20.45	16.58	8.25	4.01	0.81	48.6061	9.81818	3
8	RdVe16122017-008	41.23	28.11	20.62	16.53	8.37	4.11	0.83	49.1039	9.91637	4
9	RdVe16122017-009	41.4	28.91	19.09	14.9	7.43	3.61	0.74	48.5868	9.95962	2					Perkinsus infection
10	RdVe16122017-010	40.87	27.72	18.46	13.31	6.76	2.76	0.53	40.8284	7.84024	5					Stage	Number	%
11	RdVe16122017-011	39.58	25.72	18.39	12.06	6.13	2.77	0.65	45.1876	10.6036	3					0	0	0
12	RdVe16122017-012	44.84	30.02	20.64	17.46	8.7	3.45	0.82	39.6552	9.42529	5					1	3	6
13	RdVe16122017-013	38.84	26.15	17.8	11.63	6.02	3.13	0.63	51.9934	10.4651	2					2	15	30
14	RdVe16122017-014	46.72	30.34	21.12	18.61	10.27	5.02	0.92	48.8802	8.95813	2					3	5	10
15	RdVe16122017-015	38.54	26.58	17.61	11.38	5.61	2.8	0.56	49.9109	9.98217	2					4	12	24
16	RdVe16122017-016	38.81	26.01	18.69	12.26	6.39	2.96	0.68	46.3224	10.6416	5					5	15	30
17	RdVe16122017-017	41.28	28.67	19.94	15.33	7.89	2.84	0.55	35.9949	6.97085	5					Total	50	100
18	RdVe16122017-018	42.01	27.66	19.5	14.67	7.46	3.52	0.75	47.185	10.0536	5					Perkinsus infection(%)	114
19	RdVe16122017-019	43	29.52	19.02	14.51	7.32	3.01	0.62	41.1202	8.46995	5					A.U.	171
20	RdVe16122017-020	41.32	27.17	15.71	12.5	6.35	2.64	0.47	41.5748	7.40157	2
21	RdVe16122017-021	40.61	26.85	18.17	13.37	6.52	3.34	0.58	51.227	8.89571	2
22	RdVe16122017-022	44.73	30.79	22.18	18.71	9.2	3.44	0.75	37.3913	8.15217	1
23	RdVe16122017-023	41.86	28.39	19.91	14.66	6.93	3.53	0.71	50.938	10.2453	2
24	RdVe16122017-024	40.44	26.45	18.35	11.94	5.94	2.83	0.58	47.6431	9.76431	2
25	RdVe16122017-025	44.56	28.15	20.52	15.4	6.38	3.39	0.74	53.1348	11.5987	4
26	RdVe16122017-026	41.35	27.95	18.66	14.28	7.02	3.08	0.63	43.8746	8.97436	5
27	RdVe16122017-027	41.6	27.12	19.11	13.94	7.15	3.35	0.75	46.8531	10.4895	1
28	RdVe16122017-028	38.51	25.55	18.26	11.95	6.43	2.154	0.69	33.4992	10.7309	3
29	RdVe16122017-029	39.07	26.35	18.64	13.25	7.05	2.74	0.61	38.8652	8.65248	2
30	RdVe16122017-030	43.87	30.09	20.71	17.71	8.74	3.64	0.56	41.6476	6.40732	5
31	RdVe16122017-031	41.99	28.88	19.21	14.36	6.94	3	0.47	43.2277	6.77233	5
32	RdVe16122017-032	40.49	28.1	18.49	13.48	6.51	2	0.34	30.722	5.22273	4
33	RdVe16122017-033	38.17	27.24	18.84	12.76	6.29	2.84	0.41	45.151	6.51828	4
34	RdVe16122017-034	38.58	25.67	18.43	11.47	5.5	2.69	0.52	48.9091	9.45455	4
35	RdVe16122017-035	38.52	25.67	17.5	10.42	5.61	2.14	0.28	38.1462	4.99109	2
36	RdVe16122017-036	42.26	28.89	19.44	14.95	7.13	3.76	0.59	52.7349	8.27489	4
37	RdVe16122017-037	37.47	26.32	18.33	11.41	5.64	2.34	0.28	41.4894	4.96454	5
38	RdVe16122017-038	42.64	30.45	20.83	17.79	8.91	3.78	0.57	42.4242	6.39731	4
39	RdVe16122017-039	37.84	26.06	17.96	11.07	5.55	2.44	0.29	43.964	5.22523	5
40	RdVe16122017-040	41.63	27.62	18.43	13.77	6.75	2.98	0.5	44.1481	7.40741	4
41	RdVe16122017-041	39	28.79	19.91	14.36	6.8	3.41	0.52	50.1471	7.64706	4
42	RdVe16122017-042	38.69	26.17	17.91	10.98	4.87	2.68	0.42	55.0308	8.62423	1
43	RdVe16122017-043	41.98	28.3	19.2	14.55	6.93	3.45	0.6	49.7835	8.65801	4
44	RdVe16122017-044	40.03	28.6	19.65	14.53	7.3	2.88	0.43	39.4521	5.89041	4
45	RdVe16122017-045	41.73	27.6	17.55	12.65	6.14	2.64	0.37	42.9967	6.02606	2
46	RdVe16122017-046	43.12	28.4	19.83	15.82	7.73	2.99	0.44	38.6805	5.69211	5
47	RdVe16122017-047	38.9	27.38	19.09	12.8	6.15	3.07	0.68	49.9187	11.0569	2
48	RdVe16122017-048	40.04	27.54	18.36	12.95	6.38	2.45	0.45	38.4013	7.05329	5
49	RdVe16122017-049	41.47	29.33	19.63	15.27	7.54	3.32	0.51	44.0318	6.76393	5
50	RdVe16122017-050	41.09	29.22	20.41	14.73	6.7	3.48	0.6	51.9403	8.95522	5
AVERAGE		41.2324	27.9582	19.1958	14.1988	7.0522	3.19508	0.6078	45.453	8.60962	3.42
STDEV		2.21679	1.47032	1.19232	2.13975	1.14115	0.602239	0.168041	5.83749	1.99784	1.35662
MAX		47.35	31.31	22.18	18.71	10.27	5.02	0.93	57.9732	13.0618
MIN		37.47	25.55	15.71	10.42	4.87	2	0.28	30.722	4.96454
