# Supplementary material for: Genetic variability inRuditapes decussatusclam combined withPerkinsusinfection level to support founder population selection for a breeding program
Source: PeerJ journal article supplement (doi:10.7717/peerj.9728), 2020-10-28
Supplement: File3.xls [file File3.xls]

## Sheet: Sheet 1
Individual	Ratc134		Ratc179		Ratc125		Ratc177		Ratc185		Ratc199		Ratc212		Ratc215		Ratc219		Ratc223		Ratc238		Ratc263		Ratc28
RB01	244	250	316	334	152	170	225	243	141	141	176	182	233	233	137	155	222	234	94	106	143	149	192	192	193	196
RB02	244	250	331	337	155	167	249	252	141	141	176	176	233	242	149	158	222	222	94	94	146	146	192	198	193	193
RB03	232	244	316	319	146	152	246	249	141	141	179	182	233	251	158	170	222	222	94	94	152	155	192	204	193	193
RB04	244	250	319	322	146	152	225	252	141	147	176	176	233	242	137	149	222	222	94	100	143	146	198	201	193	193
RB05	238	253	319	328	155	155	243	246	141	141	170	176	251	251	149	155	222	234	94	94	152	155	192	192	187	193
RB06	244	253	319	331	146	152	237	258	141	141	176	179	251	251	149	155	222	234			149	152	198	198	193	196
RB07	244	244	322	325	152	152	243	246	141	141	176	176	251	257	152	158	234	234	94	94	146	155	192	198	193	193
RB08	244	250	322	334	155	167	237	249	141	141	170	170	233	239	155	173	222	222	94	94	143	152	198	201	193	196
RB09	244	250	322	325	152	167	225	252	141	141	179	185	239	251	170	170	222	234	94	94	149	155	192	198	193	196
RB10	238	244	316	319	152	170	240	249	141	141	176	182	233	242	149	155	222	222	94	100	143	158	192	198	193	193
RB11	232	250	316	340	167	167	246	249	141	141	179	182	242	251	149	158	222	222	94	94	146	152	198	201	187	187
RB12	244	250	322	322	152	167	246	252	141	147	179	179	251	251	158	170	222	222	100	100	149	155	198	198	193	193
RB13	244	253	319	322	152	167	237	240	141	147	170	176	233	242	137	158	222	237	94	109	155	158	192	192	193	196
RB14	247	250	316	319	152	167	237	246	141	141	170	182	254	254	167	170	222	234	94	100	152	155	201	201	193	193
RB15	238	238	316	331	152	167	246	249	141	141	179	179	242	251	137	158	234	237	94	94	146	155	198	198	193	193
RB16	244	247	319	325	152	167	243	249	141	141	170	176	233	242	149	149	222	234					192	204	193	193
RB17	238	247	322	337	152	158	228	228	141	141	176	176	239	242	155	158	222	222	94	106	149	155	192	192	193	193
RB18	235	259	319	325	146	152	246	246	141	141	176	179	239	251	155	155	222	222	94	94	158	158	198	201	193	196
RB19	235	247	319	319	149	152	249	252	141	141	167	182	233	239	137	155	222	222	94	94	152	155	198	198	193	196
RB20	235	244	310	322	152	152	237	240	141	147	176	179	242	251	155	158	222	222	94	94	149	152	192	201	193	193
RB21	241	250	319	319	161	170	237	255	141	141	176	182	242	251	158	170	222	222	94	100	155	155	192	201	193	193
RB22	250	253	316	322	161	161	246	246	141	141	182	182	233	254	155	158	222	234	94	94	140	152	198	198	193	196
RB23	247	250	316	322	146	167	240	249	141	147	176	179	233	242	149	155	222	222	100	100	155	155	201	201	193	193
RB24	241	244	319	319	152	152	243	249	141	141	179	182	233	242	155	158	222	222	94	94	146	155	192	198	193	196
RB25	247	250	316	319	146	158	225	237	141	147	176	182	233	239	158	170	222	222	94	94	140	146	201	201	193	196
RB26	235	244	313	319	152	152	249	252	141	144	179	179	239	251	137	149	222	222	94	94	149	155	192	204	193	193
RB27	235	247	319	319	152	158	243	246	141	141	176	176	233	233	167	170	222	222	94	100	152	155	198	201	196	196
RB28	238	247	319	322	146	170	237	237	141	147	176	179	233	239	131	155	222	237	94	94	140	155	192	204	193	196
RB29	247	250	319	325	164	167	237	249	141	147	179	179	242	251	137	161	222	222	94	94	146	155	198	201	193	193
RB30	244	244	322	334	152	167	243	252	138	141	170	182	233	251	158	167	222	222	94	106	140	149	192	198	193	196
RB31	244	244	319	331	152	152	231	237	141	147	170	176	233	233	137	158	222	234	94	94	146	152	204	204	193	193
RB32	235	250			152	167	237	246	141	141	170	182	233	251	137	158	222	234	100	109	152	152	198	198	193	196
RB33	241	250	331	331	167	170	243	249	141	147	176	179	233	251	149	149	222	234	94	106	146	149	192	198	193	196
RB34	238	250	319	322	152	167	225	231			179	188	251	251	149	170	234	234	94	106	146	149	192	198	193	193
RB35	244	244	316	319	167	167	225	243	138	147	176	176	233	233	143	149	222	234	94	94	143	152	198	198	193	193
RB36	238	244	319	325	146	152	225	237	141	147	170	170	233	251	143	158	222	222	94	100	152	155	192	198	193	196
RB37	250	253	319	319	152	155	246	249	141	141	179	182	242	245	155	164	222	222	94	94	146	152	192	201	193	196
RB38	238	244	316	322	146	170	243	249	141	141	176	179	239	242	137	164	222	234	94	100	146	160	192	198	193	193
RB39	238	244	316	331	146	167	237	246	141	141	176	182	233	251	137	149	222	222	94	94	140	152	192	198	193	193
RB40	238	250	325	331	155	167	246	249	141	147	176	182	233	242	170	170	222	234	94	94	146	155	192	198	193	196
RB41	241	244	325	334	146	146	237	246	141	141	179	179	242	254	158	176	222	237	94	94	146	152	192	192	193	196
RB42	238	247	316	331	152	167	237	246	141	147	179	182	233	251	152	155	222	222	94	94	149	149	198	201	193	193
RB43	241	244	325	334	152	167	249	252	141	147	170	179	242	251	137	137	222	222	94	100	140	146	198	204	193	193
RB44	244	244	319	322	152	167	252	252	141	156	176	176	239	251	137	170	222	222	94	106	155	155	192	192	193	196
RB45	238	250	322	331	152	155	246	246	141	141	176	182	233	254	137	155	222	222	94	94	143	152	192	192	190	196
RB46	244	247	316	328	155	161	237	243	141	147	176	176	251	251	137	137	222	234	94	106	146	146	192	201	193	193
RB47	238	247			152	152	240	246	141	147	176	176	233	251	137	158	222	222	94	94	152	152	198	198	193	193
RB48	238	250	313	322	146	152	243	252	141	141	170	176	242	248	155	158	222	222	94	94	143	146	192	192	193	196
RB49	235	244			146	167	243	249	141	141	179	182	251	251	137	176	222	222	94	94	140	146	192	201	193	193
RB50									141	147	176	182					222	234	94	94			192	198
BA01	232	244	313	322	167	167	237	237	141	144	170	179	233	251	155	158	222	222	94	94	149	158	192	201	193	193
BA02	235	244	319	331	152	161	243	243	141	141	170	176	233	233	155	170	222	234	94	94	155	158	192	198	193	193
BA03	244	250	316	322	146	167	237	255	141	144	176	188	251	251	137	155	222	234	94	109	158	164	192	198	193	193
BA04	235	250	304	328	155	155	246	252	141	147	176	179	239	242	137	167	222	222	94	94	152	152	183	198	196	196
BA05	244	250	319	334	152	152	249	255	141	141	179	179	233	251	137	170	222	222	94	106	149	155	198	198	193	193
BA06	241	244	322	331	155	167	249	249	141	141	170	170	242	251	137	143	222	234	94	100	146	146	192	198	196	196
BA07	244	247	307	307	152	167	246	255	141	141	179	182	239	242	155	173	222	222	94	94	149	155	192	198	193	196
BA08	238	253	313	328	152	152	237	252	141	141	176	176	233	245	149	155	222	234	94	94	149	160	192	198	193	193
BA09	244	250	310	325	152	155	243	255	141	147	176	179	242	251	137	149	222	222	94	100	152	155	198	201	193	196
BA10	235	250	319	328	152	152	240	255	141	156	170	179	233	251	149	167	222	234	94	94	143	146	198	201	193	193
BA11	244	244	316	322	152	155	225	246	141	141	176	176	233	242	158	170	222	222	100	109	143	149	192	201
BA12	238	250	307	319	152	167	246	246	141	141	170	179	233	251	164	170	222	234	94	94	152	152	192	201	193	193
BA13	238	244	322	325	167	167	246	249	141	144	176	179	233	251	137	170	234	234	106	106	146	152	192	201	193	193
BA14	238	244	316	319	155	155	237	249	141	141	179	182	251	251	149	155	222	222	97	100	149	155	192	198	193	193
BA15	238	244	319	322	152	155	243	246	141	141	176	179	242	254	137	149	222	228	94	94	152	164	198	198	193	193
BA16	250	253			152	167	249	249	141	141	170	176	242	251	164	170	222	234	94	106	152	160	192	198	193	193
BA17	244	247	316	325	155	170	243	252	141	141	167	179	233	242	155	158	222	222	94	94	146	155	198	198	193	196
BA18	244	247	319	328	152	155	243	255	141	141	176	182	251	251	137	173	222	222	100	100	155	158	192	198	193	196
BA19	244	244	319	319	155	158	246	252	141	141	170	179	233	251	143	167	222	222	94	100	146	164	192	192	193	193
BA20	247	250	310	319	152	158	246	252	141	141	176	179	233	242	149	170	222	222	94	94	152	158	198	198	181	193
BA21	235	244	316	319	152	152	240	249	141	141	179	179	233	251	161	170	222	222	94	106	158	160	198	201	193	193
BA22	247	250	319	322	152	152	252	252	141	141	170	182	233	233	155	170	222	234	94	94	152	155	192	192	196	196
BA23	232	235	319	322	152	167	249	252	141	144	170	182	233	242	137	170	222	234	100	100	146	149	192	198	193	196
BA24	232	244	319	328	152	167	246	252	141	141	176	185	233	242	155	155	222	222	97	109	146	155	192	198	196	196
BA25	244	247	322	322	152	152	255	258	141	141	176	179	233	239	143	155	222	222	94	106	152	160	192	198	193	193
BA26	235	250	316	319	152	167	240	252	141	141	176	182	233	251	149	173	222	222	106	109	143	152	198	204	193	193
BA27	238	241	322	331	152	152	237	252	141	144	179	188	242	251	137	158	222	234	94	94	146	152	201	204	193	193
BA28	253	256	313	316	152	167	243	258	141	147	170	179	233	242	149	158	222	222	94	94	146	155	192	198	190	193
BA29	238	247	316	316	152	155	243	252	141	141	176	176	233	242	143	158	234	234	94	94	152	155	192	201	193	193
BA30	244	250	319	322	146	149	237	249	141	141	176	176	233	242	155	167	222	222	94	100	155	155	192	198	193	193
BA31	244	250	325	328	152	158	240	246	141	141	179	182	233	239	155	173	222	222	94	100	146	155	192	198	193	193
BA32	244	250	319	328	155	170	246	252	141	141	170	179	233	251	158	170	222	222	94	103	146	146	198	201	193	196
BA33	241	262	313	319	152	155	246	246	141	147	170	176	242	251	137	137	234	234	94	94	143	155	198	198	193	193
BA34	235	244	319	325	152	152	252	252	141	141	176	179	233	233	149	173	222	234	94	94	146	155	198	198	193	193
BA35	253	259	319	322	152	155	231	252	141	141	179	182	251	251	155	167	222	222	94	100	149	164	192	198	193	196
BA36	244	250	316	331	152	155	228	243	141	144	170	182	251	251	143	167	222	234	100	100	143	155	192	204	196	196
BA37	238	244	319	331	152	167	246	252			176	176	242	242	161	170					155	160	192	204	193	196
BA38	235	244	313	331	152	167	237	246	141	144	170	176	242	251	158	170	222	234	94	100	143	155	198	204	193	196
BA39	238	250	310	331	152	152	243	249	141	141	170	176	233	251	137	155	222	222	94	94	155	158	201	201	193	196
BA40	238	244	319	322	152	152	237	243	141	147	173	179	233	242	137	155	222	222	94	97	158	158	192	198	196	196
BA41	235	238	316	319	152	152	246	249	141	147	179	182	233	251	149	158	222	234	94	94	143	149	198	198	193	193
BA42	238	244	313	316	152	167	246	252	141	147	170	176	233	251	155	158	222	234	94	94	146	155	192	192	193	193
BA43	238	247	319	328	152	152	246	249	141	147	179	179	251	251	137	158	222	234	94	94	155	155	198	204	193	193
BA44	241	244	316	322	152	167	243	246	141	147	176	176	233	251	158	167	222	222	94	94	152	152	198	201	193	196
BA45	238	244	319	322	155	167	243	255	141	147	170	176	233	242	149	155	216	222	94	94	155	160	192	204	193	196
BA46			316	325	152	167	243	246	141	141	179	185	242	242	137	149	222	222	94	100	146	149	192	198	193	193
BA47	244	244	316	322	146	155	237	243	141	147	179	182	233	236	137	155	222	234	94	100	140	158	192	192	193	193
BA48	250	250	319	328	152	152	237	249	141	141	176	176	233	251	158	170	222	222	94	94			192	201	193	193
BA49	247	247	325	334	155	158	246	246	141	141	179	182	233	245	158	170	222	234	100	109	146	160	198	198	193	193
BA50	244	247	334	334	155	167	249	258	141	141	170	170	242	251	155	155	222	222	94	106	149	152	192	198	193	193
PO01	232	235	322	322	146	167	249	252	141	147	170	176	242	251	137	158	222	222	94	94	155	158	198	201	193	196
PO02	244	250	307	319	146	167	246	252	141	147	176	176	239	251	155	170	222	237	100	100	152	158	183	192	193	196
PO03	244	250	319	331	146	155	240	243	141	147	176	185	233	242	155	158	222	234	94	100	146	155	192	198	193	193
PO04	235	244	316	319	152	167	249	252	141	147	179	182	233	239	158	170	234	234	100	103	149	152	192	192	193	196
PO05			316	322	152	155	240	243	141	141	176	179	233	251	149	149	222	222	94	106	146	149	192	192	193	193
PO06	247	250	325	331	152	152	237	249	141	141	170	176	233	242	155	155	222	234	94	94	152	152	198	201	193	193
PO07	247	250	313	325	152	152	249	255	141	141	170	182	242	242	155	173	222	234	94	106	143	146	192	198	193	196
PO08	238	250	316	316	146	152	246	255	141	150	170	170	233	251	149	155	222	222	94	94	146	146	192	198	193	193
PO09	238	247	313	334	152	152	246	249	141	141	176	179	233	251	158	176	222	222	94	94	146	155	192	198	193	196
PO10	244	244			152	152	246	249					251	251	158	167									193	193
PO11	238	241	319	328	146	146	246	249	141	141	179	182	233	251	155	155	222	222	94	100	146	152	183	198	196	196
PO12	235	238	310	313	155	161	246	246	141	141	170	182	233	254	143	158	222	222	94	94	146	152	192	198	193	193
PO13	238	244			152	161	237	249	141	141	176	179	239	251	155	173	222	222	94	94	143	146	198	198	193	196
PO14	238	244	307	319	146	167	249	252	141	141	170	176	251	251	158	170	234	234	94	94	158	160	198	198	193	193
PO15	241	244	310	325	146	155	240	249	144	147	179	179	242	242	155	158	222	222	94	100	143	149	198	201	193	193
PO16			316	319	152	152	246	246	141	141	179	179	233	233	155	176	222	234	94	94	143	155	198	201	193	193
PO17	244	247	319	319	152	155	246	249	141	141	170	176	233	233	149	155	222	234	94	109	143	152	192	192	193	193
PO18	238	244	319	328	152	152	228	252	141	141	176	176	233	245	137	164	222	234	94	106	143	158	192	198	193	196
PO19	238	244	319	319	146	152	243	252	141	141	182	182	233	242	149	170	222	234	94	94	140	155	192	198	196	196
PO20	244	244	322	334	152	164	237	249	147	147	176	179	233	239	134	158	234	234	94	94	155	155	192	198	193	193
PO21	235	238			155	155	237	252	141	147	176	179	251	251	161	173	222	222	94	100	155	155	198	201	193	196
PO22	250	250	319	328	152	155	249	252	138	141	170	179	233	251	164	173	222	234	94	100	143	155	198	198	193	193
PO23	238	244	313	328	152	173	246	249	141	141	170	179	239	242	137	158	222	222	94	94	146	152	192	198	193	193
PO24	247	250	316	325	152	152	252	261	141	147	170	179	242	242	155	176	222	222	94	109	149	155	198	201	193	196
PO25	238	244	325	325	161	170	255	255	141	141	170	170	239	251	158	176	234	234	94	94	152	155	201	201	193	196
PO26	244	244	319	322	152	152	246	249	141	141	170	179	233	239	149	155	222	234	94	94	149	155	198	201	193	193
PO27	250	253	322	325	161	167	243	243	141	141	170	179	251	251	155	158	222	222	94	100	146	152	192	192	193	196
PO28	250	250	319	328	152	155	249	249	141	147	170	173	242	251	149	155	222	222	94	106	146	152	192	201	190	193
PO29									141	141	170	179					222	222	94	106	140	155	198	201
PO30	244	250	316	337	152	152	225	243	141	147	170	179	251	251	164	173	222	234	94	94	146	158	198	201	190	193
PO31	241	250			152	152	243	243	141	141	170	170	242	242	170	170	222	234	94	94	143	152	198	198	193	196
PO32	241	244	319	331	152	152	240	246	141	141	170	170	242	242	137	155	222	234	94	94	143	155	198	198	193	196
PO33	244	250	319	340	152	161	240	252	141	144	170	173	233	251	176	179	222	234	94	94	149	160	183	198	193	196
PO34	247	250	310	322	152	155	246	252	141	147	179	179	233	239	170	173	222	222	94	94	152	152	192	192	193	196
PO35	244	250	316	331	152	152	240	246	141	147	176	179	233	242	137	155	234	234	94	94	146	155	198	204	193	196
PO36	244	253	313	325	152	167	249	255	147	147	170	173	251	251	170	176	222	234	94	100	143	146	198	201	193	193
PO37	244	244	319	322	146	152	246	252	141	141	170	179	242	251	155	158	222	222	94	100	143	155	192	198	193	193
PO38									141	141	170	170					222	234	94	106	152	155	192	195	193	196
PO39	235	238	325	328	152	152	243	255	141	141	182	185	233	242	137	158	222	234	94	106			192	201	190	193
PO40	244	247	319	322	152	152	240	240	141	141	170	176	233	251	170	173	234	234	94	100	152	155	192	201	193	196
PO41	244	244	316	331	155	155	249	249	141	141	176	182	233	254	155	164	222	222	94	94	146	155	198	198	196	196
PO42	241	250	319	328	152	152	237	258	141	141	170	176	233	242	137	137	222	222	94	94	143	155	198	198	193	193
PO43	244	253	319	334	152	152	243	249	147	147	179	179	233	251	155	158	222	234	94	106	149	155	201	201	193	193
PO44	244	250			152	152	246	246	141	141	176	176	233	239	158	170	222	234	94	94	143	146	198	201	193	196
PO45	235	247	319	325	155	167	246	246	141	141	170	170	242	251	149	155	222	222	94	94	155	155	198	201	196	196
PO46	244	244	319	328	152	161	246	246	141	141	176	179	233	251	155	167	222	234	94	100	140	152	198	198	193	196
PO47	247	250	313	319	146	152	243	249	141	144	170	188	242	251	158	170	222	222	94	97	140	149	192	198	190	193
PO48	241	244	316	325	152	152	246	246	141	141	179	179	242	251	152	158	222	222	94	100	155	155	198	198	193	193
PO49					152	152	249	252	141	141	173	176	233	233	158	170	222	234	94	94	155	158	198	201	193	193
PO50	244	250	316	322	152	167	240	243	141	141	176	179	233	245	155	164	222	222	94	106	146	155	192	198	193	193
CG01	241	244	325	331	152	155	237	243	141	141	170	170	233	245	155	164	222	222	94	94	143	152	198	198	193	193
CG02	241	244	316	322	152	152	243	258	141	141	176	179	233	233	137	155	222	228	94	112	146	155	192	204	193	196
CG03	241	250	325	331	152	152	237	249	141	144	173	176	242	251	155	176	222	234	94	94	152	158	198	198	193	193
CG04	235	241	322	322	152	152	243	246	141	144	173	176	242	251	155	167	222	234	94	94	152	158	198	198	193	193
CG05	244	253	319	322	152	155	249	249	141	147	170	179	251	251	149	167	222	234	94	94	146	149	192	198	193	193
CG06	244	262	319	322	146	152	243	249	141	141	176	179	233	242	158	158	234	234	94	100	155	155	192	192	193	193
CG07	235	247	328	334	152	152	243	255	138	141	182	182	233	239	137	158	222	234	94	100	152	152	198	201	193	196
CG08	244	250	322	322	152	158	240	246	141	147	170	179	233	251	149	170	222	234	94	109	146	149	198	201	196	196
CG09	244	250	316	316	152	155	246	252	141	141	176	182	233	251	155	167	222	222	94	94	152	152	198	201	193	196
CG10	253	259	325	325	155	167	249	261	141	141	176	176	233	251	170	170	222	222	94	94	146	149	201	201	193	193
CG11	244	253	310	325	152	152	252	255	141	141	170	179	245	251	167	173	216	222	94	106	143	155	198	198	193	193
CG12	244	253	319	325	152	152	225	252	141	141	179	179	242	242	155	158	222	222	94	94	146	152	198	198	193	193
CG13			319	331	155	173	231	258	141	141	170	188	233	239	137	155	222	222	94	100	146	155	198	201	193	193
CG14	238	241	310	331	152	155	243	252	141	141	170	179	233	251	158	170	222	222	94	94	146	146	192	198	193	196
CG15	241	244	322	328	152	152	237	243	141	141	170	179	233	242	155	173	222	222	94	94			198	201	193	193
CG16	244	247	319	322	152	155	246	261	141	141	170	182	233	254	170	182	222	222	94	94	146	146	192	192	193	193
CG17	235	247	328	331	152	155	243	246	141	147	176	179	251	251	137	158	222	222	94	94	152	155	198	198	193	196
CG18
CG19	244	250	319	322	152	164	240	243	141	141	179	179	233	239	143	149	234	234	94	112	143	155	192	198	193	196
CG20	247	250	316	334	170	170	243	246	141	144	176	176	245	251	137	170	222	222	94	94	146	158	198	198	193	193
CG21									141	141							222	234	94	94			198	198
CG22	244	250	316	319	152	155	249	252	141	147	179	182	233	242	155	158	222	222	94	106	146	146	192	198	193	196
CG23	235	250	319	319	152	152	249	255	141	141	170	176	242	251	137	158	222	234	94	94	149	152	192	198	193	199
CG24	244	250	322	325	152	155	246	249	141	147	170	179	242	251	170	173	222	234	94	94	146	152	198	198	187	196
CG25	247	250	310	313	152	155	243	252	141	141	170	179	233	242	137	182	222	222	94	97	152	155	198	198	193	193
CG26	244	247	316	337	152	155	246	246	141	141	170	176	242	242	158	164	222	234	94	97	149	155	177	198	193	196
CG27	244	250	316	319	152	155	231	237	141	141	176	176	239	260	173	176	234	234	94	94	146	149	192	198	193	193
CG28	244	244	313	322	152	152	249	252	141	141	170	179	233	251	155	167	222	222	94	94	152	155	198	198	187	193
CG29	244	250	316	325	146	167	246	249	147	147	170	176	251	251	143	167	222	222	94	94	146	152	198	201	190	193
CG30	238	247	319	322	152	152	237	249	141	141	176	179	233	251	170	170	234	234	94	100	149	155	198	198	193	193
CG31	238	247	310	337	152	152	240	252	141	141	176	179	233	251	155	170	222	234	94	94	155	158	192	198	193	196
CG32	238	244	322	322	146	146	249	252	141	141	170	170	239	254	158	158	222	234	94	94	155	158	198	198	193	193
CG33	241	250	319	322	155	161			141	141	170	179	242	251	137	158	222	234	106	109	152	152	192	198	187	193
CG34	238	244	319	322	152	167	237	237	141	141	170	176	245	254	155	158	222	234	94	94	143	152	198	198	193	193
CG35	244	250	316	322	146	146	225	252	141	141	179	182	245	251	146	167	234	234	94	106	146	155	198	198	193	193
CG36	235	247	316	319	152	152	225	252	141	141	170	179	233	242	158	170	222	234	94	94	155	155	198	198	193	193
CG37	235	241	319	325	146	152	243	249	141	141	176	179	233	251	149	158	222	234	94	94	146	149	192	198	193	196
CG38	250	250	313	328	146	146	243	249	141	141	176	179	239	251	149	155	222	234	94	94	149	155	192	198	193	193
CG39	244	250	313	328	152	152	225	252	141	147	176	176	233	233	158	170	222	234	94	94	149	155	198	201	196	196
CG40	238	244	325	328	152	155	240	246	141	141	176	179	245	251	158	164	222	222	94	94	146	146	192	198	193	193
CG41	238	247	322	322	152	155	240	249	141	141	176	182	233	251	149	155	222	234	94	94	146	158	198	198	193	196
CG42	244	244	313	319	152	152	243	249	141	141	170	170	251	251	155	155	222	234	94	94	140	146	198	201	193	193
CG43	238	241	322	331	161	170	225	246	141	141	170	170	233	251	155	158	222	234	94	94	146	155	198	198	193	193
CG44	238	247	322	322	146	152	237	246	141	141	170	179	242	242	158	167	222	222	94	100	152	152	198	201	196	196
CG45	238	250	319	322	152	167	240	243	141	147	170	188	245	251	137	170	222	234	94	94	152	158	198	201	178	193
CG46	238	238	316	322	146	155	246	246	141	141	170	176	233	251	155	173	234	234	94	94	146	158	198	198	193	196
CG47	238	238	322	328	146	161	252	252	141	141	179	179	251	251	149	155	222	222	94	94	149	158	192	198	196	196
CG48	244	250	316	322	152	152	240	243	141	141	170	176	233	251	137	164	222	234	106	106	149	152	198	201	193	196
CG49	238	244	322	328	152	152	243	255	141	141	170	176	233	251	170	173	222	222	94	112	146	158	192	201	193	196
CG50	238	241	319	319	152	152	240	258	141	141	176	182	233	251	149	155	222	234	106	106	152	152	198	201	187	193
AV01	247	256	310	316	152	164	249	249	141	147	179	182	233	251	152	152	222	234	94	94	149	155	198	198	193	193
AV02	244	250	316	319	155	167	249	255	141	147	170	173	239	242	152	167	222	222	106	109	152	152	192	198	193	193
AV03	250	253	316	319	152	155	252	252	141	147	176	179	233	251	146	152	222	222	94	106	146	149	198	201	193	196
AV04	235	253	322	328	152	155	243	246	141	147	170	170	233	233	152	167	222	234	94	106	149	149	192	201	193	193
AV05	244	247	316	325	152	152	240	255	141	141	176	179	233	242	155	164	222	234	94	94	143	149	192	198	193	193
AV06	238	241	334	334	152	155	243	246	141	141	170	176	251	251	152	158	222	222	100	106	146	146	198	198	193	196
AV07	244	247	319	334	146	152	225	252	141	141	170	182	242	251	152	164	222	234	94	94	146	158	198	201	193	196
AV08	244	259	307	319	152	152	249	252	141	141	170	179	239	251	146	152	222	234	94	106	140	146	201	201	193	193
AV09	238	241	322	322	152	152	246	252	141	141	176	179	233	251	152	167	222	222	94	94	146	149	198	201	193	196
AV10	244	256	319	325	146	167	249	252	138	141	170	170	251	251	152	155	222	234	94	94	155	155	192	198	193	196
AV11	244	247	316	325	152	152	237	243	141	141	170	176	248	251	155	170	222	234	94	94	143	146	198	204	193	193
AV12	238	238	319	343	149	152	246	249	141	141	176	179	242	251	152	155	222	231	94	94	146	146	192	192	193	193
AV13	244	244	319	328	152	152	243	258	141	144	170	179	233	251	152	167	222	222	94	94	152	155	198	198
AV14	244	250			152	152	240	249	141	141	176	179	245	251	161	167	222	222	94	106	152	155	192	198	193	193
AV15	235	253	322	328	152	155	237	240	141	141	179	179	233	251	152	152	222	234	94	94	149	155	192	198	187	193
AV16	247	247	319	325	146	155	243	246	141	141	170	182	233	242	155	158	234	234	94	106	143	143	198	201	193	193
AV17	244	244	313	316	152	167	243	258	141	141	170	170	233	251	134	158	222	222	94	94	143	158	198	198	193	196
AV18	247	250	310	319	146	152	246	246	141	144	176	179	233	251	146	167	222	222	94	100	143	149	192	192	193	196
AV19	247	250	316	322	152	170	246	249	141	141	179	179	233	251	152	155	222	234	94	94	146	158	192	198	193	196
AV20	244	247	316	319	152	167	249	249	141	150	170	179	233	242	137	152	222	222	100	106	143	146	192	192	193	193
AV21	244	250	322	325	146	161	246	249	141	147	176	179	239	251	152	155	234	234	94	109	146	146	192	201	193	193
AV22	235	244	328	328	152	167	243	246	141	141	176	179	233	242	149	167	234	234	94	106	143	152	198	198	193	196
AV23	244	250	319	331	146	155	243	249	141	147	170	170	251	251	146	152	222	234	94	94	149	149	198	198	193	193
AV24	244	247	319	325	152	161	240	252	141	153	176	185	233	239	149	152	222	222	94	94	149	149	192	201	193	193
AV25	244	253	316	316	152	152	243	255	141	141	170	176	242	254	146	167	222	222	94	94	146	149	192	201	187	193
AV26	244	247	310	319	146	152	237	237	141	141	179	179	233	233	134	155	222	234	94	94	140	149	198	201	193	196
AV27	238	247	322	334	152	167	246	249	141	141	176	176	251	251	164	167	222	234	94	94	155	158	198	198	193	196
AV28	250	250	319	328	152	152	240	252	141	141	170	179	233	251	170	173	222	222	94	100	146	146	198	201	193	193
AV29	244	250	310	334	152	167			141	141	170	170	242	251	152	155	222	234	94	94	149	158	201	201	193	196
AV30			328	331	152	155	240	243	141	141	170	170	233	251	161	173	222	222	94	94	140	146	192	204	193	193
AV32	250	253	316	322	152	155	252	255	147	147	170	176	233	242	152	167	222	234	94	94	152	155	198	198	193	196
AV33	244	250	319	331	152	167	225	243	141	141	179	179	233	233	146	155	222	228	94	106	152	155	198	198	193	193
AV34	238	247	316	316	152	152	246	255	141	141	179	179	251	254	161	170	222	222	94	94	146	158	198	201	193	193
AV35	235	250	319	322	152	152	243	249	141	141	170	179	242	251	146	146	222	222	94	100	146	152	198	198	193	196
AV36	244	250	319	334	152	155	246	249	141	141	170	176	251	251	167	173	222	222	94	100	143	155	192	198	193	193
AV37	244	250	319	322	146	152	225	249	141	141	170	176	233	251	134	134	222	222	94	94	152	158	192	198	193	193
AV38	238	247	319	331	146	164	249	249	141	147	176	179	242	251	164	167	222	234	94	94	152	155	198	198	193	196
AV39	235	244			146	152	225	258	141	141	170	170	233	251	152	155	234	234	94	97	146	149	198	201	193	193
AV40	238	253	319	319	152	152	237	243	141	141	176	176	239	251	134	146	222	234	106	106	146	155	198	198	193	193
AV41	235	250	316	334	155	155	246	249	141	141	176	176	251	251	152	152	222	222	94	94	149	155	192	198	193	193
AV42	250	250	319	328	155	155	243	246	138	141	170	176	233	245	167	170	222	222	94	94	146	158	192	198	193	196
AV43	247	250	319	328	152	155	246	246	141	141	170	176	233	242	155	164	222	234	94	94	149	155	198	198	193	196
AV44	244	250	316	328	146	152	246	246	141	141	176	176	233	242	164	167	222	234	94	100	152	152	192	198	193	196
AV45	244	250	307	316	146	152	249	255	141	141	170	176	233	239	152	155	222	222	94	97	149	152	201	201	193	196
AV46	244	244	316	334	152	167	240	246	147	147	176	179	242	242	152	170	234	234	94	94	155	160	198	201	196	196
AV47	244	244	313	325	152	152	225	243	141	141	170	179	242	251	170	176	222	222	94	94	149	149	192	198	193	193
AV48	244	244	313	319	146	164	228	249	141	144	176	179	233	251	152	152	222	222	94	94	146	155	198	198	193	196
AV49	235	256	319	322	164	167	240	249	138	141	170	176	233	251	170	170	222	228	94	106	146	149	198	198	193	196
AV50	238	247	301	319	146	152	246	252	141	147	170	179	233	251	167	167	222	222	94	94	155	158	198	198	193	196
OB01	229	250	319	319	146	152	249	255	141	141	176	179	233	251	134	167	234	234	94	94	146	164	192	192	193	193
OB02					152	158	225	243	141	147	170	179	251	251	155	164	222	222	94	94	149	155	177	198	193	193
OB03	238	241	313	319	152	167	240	255	141	141	176	179	233	251	161	161	222	234	94	100			198	198	193	193
OB04							246	252	141	147	176	179	251	251			222	222	94	94	146	152	192	198	193	196
OB05	235	250	319	319	152	155	249	249	141	141	176	176	233	251	155	155	222	234	94	94	149	158	183	201	196	196
OB06					152	161			141	141	170	176	233	239			222	222	94	100			192	192	193	193
OB07	232	250	319	319	146	152			141	141	170	179	251	251	146	146	222	222	94	103	146	152	192	192	193	193
OB08	241	250	322	328	146	155	246	249	141	144	176	188	251	251	134	146	222	234	94	94			198	201	193	196
OB09	232	244	319	331	146	152	246	252	141	147	173	173	251	257	152	155	222	234	94	106	149	158	192	201	193	196
OB10	238	250			152	152	237	249	141	141	176	176	233	254	146	152	222	222	94	94	152	155	192	198	193	196
OB11	238	238			152	155	225	246	141	141	176	182	242	251	134	152	222	222	100	100	152	164	192	201	193	193
OB12	238	244	322	331	152	167	240	243	141	141	176	179	233	251	155	164	222	234	94	94	155	155	192	198	193	196
OB13	250	253	322	325	152	170	225	234	141	147	176	176	233	233	146	155	222	234	94	100	152	155			193	193
OB14	241	244	319	319	152	155	237	252	141	141	170	170	251	251	134	155	222	222	94	100	143	152	192	198	193	193
OB15	247	250	313	325	152	152	243	246	141	141	176	179	239	251	152	170	222	234	94	94	155	158	198	198	193	196
OB16	247	250	319	322			246	252	141	141	179	182	239	251	152	155	234	234	94	119	146	158	198	198	193	193
OB17	244	244	322	328	152	161	240	249	141	141	170	176	251	251	152	164	222	222	94	112	143	152	198	198	193	193
OB18	244	247	325	331	152	152	237	237	141	141	170	182	251	251	146	170	222	222	94	100	149	155	198	213	193	193
OB19	241	250	322	328	152	155	243	246	141	147	176	182	242	245	146	155	222	234	94	94	149	149	198	201	193	193
OB20	244	250	316	322	149	152	243	249	141	141	176	176	233	251	164	170	222	234	94	106	143	152	198	201	193	193
OB21	232	253	316	322	152	155	249	249	141	147	170	179	233	251	158	167	234	234	94	100	143	152	198	198	193	193
OB22									141	141	176	179					222	222	94	94	155	155	198	201	193	193
OB23	244	244	322	322	152	152	249	255	141	141	170	182	251	251	161	167	222	222	94	94	149	149	198	201	193	193
OB24	238	244	316	316	146	152	249	267	141	141	176	179	242	251	152	152	222	222	94	94	155	155	183	201	193	193
OB25	244	253	328	337	152	155	246	255	141	147	170	182	233	242	146	146	222	234	94	100	143	146	198	204	193	196
OB26	235	238	319	325	152	167	237	246	141	141	176	179	233	239	149	155	222	234	94	100	146	146	189	198	193	193
OB27	238	241			152	152			141	141	170	176	251	251	152	170	222	222	94	100	146	155	192	198	193	196
OB28	238	250	319	334	155	155	246	249	141	141	170	170	233	251	137	155	222	222	100	100	149	158	198	198	193	193
OB29	238	244	316	325	152	152	243	246	141	147	170	176	251	251	134	152	222	234	94	94	152	160	198	198	193	196
OB30	238	238			152	152			141	141	170	176	233	251	155	164	222	234	94	94	146	146	192	201	193	196
OB31	238	244			152	167	240	246	141	147	170	176			134	167	222	234	94	106	146	152	192	201	193	196
OB32	235	244	316	319	146	152	225	246	141	141	176	179	251	251	152	155	222	234	94	94	146	155	198	201	190	193
OB33	241	247	319	325	146	152	225	246	141	147	179	182	251	251	146	152	222	234	94	100	143	158	192	198	193	196
OB34	238	250	310	319	152	152	246	255	141	141	173	176	245	251	146	176	222	234	100	106	146	155	192	198	193	193
OB35	247	253	319	322	152	152	249	249	141	141	176	179	242	251	155	167	222	222	94	94	143	149	198	201	193	193
OB36	244	247			152	164	246	249	141	141	170	176	251	251	146	152	222	234	94	94	146	155	192	198	193	193
OB37	238	244	316	319	152	152	243	246	141	141	179	182	233	233	152	167	222	222	94	94	146	155	198	201	193	193
OB38	244	244			152	155	249	252	141	141	170	176			155	164	222	222	94	94	143	146	198	198	190	193
OB39	238	247	319	337	152	173	249	249	144	147	170	176	242	242	134	161	222	222	94	94	152	152	198	198	193	193
OB40	238	238	319	322	146	152	246	246	141	141	176	179	239	239	152	152	222	234	94	94	155	158	192	198	193	193
OB41	244	244	316	319	146	170	252	252	141	147	170	176	233	251	158	167	222	234	94	94	146	152	192	198	187	196
OB42					152	152			141	141			239	251			222	234	94	100					193	193
OB43	238	238			152	152			141	141	170	170	242	242	137	155	222	222	94	94	146	149	192	198	193	193
OB44	244	250	322	325	146	152	246	252	141	141	176	179	233	251	152	170	234	234	94	94	149	152	192	198	187	193
OB45	235	244	319	331	152	155	246	249	141	141			233	251	146	167	234	234			158	158	198	201	193	193
OB46	235	250			146	155	246	258	141	147	170	179	233	233	134	164	222	222	94	94			198	204	193	196
OB47	229	250	316	322	152	152	243	258	141	147	170	176	233	251	155	170	222	222	94	94	146	152	198	201	193	193
OB48	238	241			146	152			141	141	170	176	233	239	152	152	222	222	94	106	146	152	198	198	193	196
OB49	244	244			152	167	249	249	141	141	176	176	242	242	134	158	222	234	94	100	146	160	192	198	193	193
OB50	238	244			152	167			141	141	176	182	239	251			222	234	94	94	149	152	192	198	193	193
AL01	235	244	316	319	146	155	237	246	141	141	176	179	239	251	137	158	222	222	94	94			198	198	193	193
AL02	247	250	310	325	146	152	225	249	138	141	176	185	242	242	149	173	222	234	94	106	146	149	192	198	193	193
AL03	244	259	316	319	146	152	246	255	141	141	170	176	245	251	149	170	222	234	94	94	149	155	198	198	193	196
AL04	238	244	313	319	152	152	237	237	141	141	170	182	233	251	137	173	222	222	94	94	146	149	192	198	193	193
AL05	244	250	319	328	152	155	246	249	141	141	170	176	248	251	143	158	222	234	94	94	143	146	198	198	193	193
AL06	238	244	322	322	146	161	228	243	141	147	176	179	233	242	137	155	222	234	94	94	146	152	192	201	193	196
AL07	247	250			152	152	249	252	141	147	170	176	233	251	137	137	234	234	94	94	143	152	198	201	193	193
AL08	238	247	319	331	146	152	237	237	141	141	179	179	251	251	149	176	222	234	94	100	155	164	198	198	193	193
AL09	247	250	322	325	146	152	240	243	141	141	176	176	251	254	149	158	222	222	100	100	146	152	192	198	193	193
AL10	238	244	316	322	152	152	237	243	141	141	176	182	242	251	149	161	222	222	94	94	149	155	198	201	193	193
AL11	244	247	316	316	146	161	234	252	141	156	170	176	233	242	137	149	222	222	94	94	152	155	198	198	193	196
AL12					146	152			141	141	170	176	251	251	158	170	222	222	94	94	140	140	192	192	193	196
AL13	241	244	313	319	152	155	237	249	141	141	176	179	236	251	137	158	222	234	94	100	146	149	198	201	193	193
AL14	247	250	331	334	152	152	246	255	141	141	176	176	242	242	149	176	222	222	94	94	149	160	192	198	193	196
AL15	238	238	313	325	146	152	243	243	147	147	176	182	233	251	137	137	222	222	94	94	149	149	198	198	190	193
AL16	244	247	316	316	146	161	234	252	141	156	170	176	233	242	137	149	222	222	94	94	152	155	198	198	193	196
AL17	247	250	316	331	146	152	243	252	141	141	176	179	233	251	158	173	222	222	94	100	149	155	198	198	196	196
AL18	235	247	316	331	146	155	225	228	138	141	170	185	233	251	149	155	222	234	94	94	143	155	198	198	193	193
AL19	244	250	328	334	152	155	246	246	141	156	176	179	233	242	152	173	222	234	94	94			192	198	193	193
AL20	247	250	316	319	152	155	246	249	141	147	176	176	242	251	149	155	222	234	94	94	146	152	192	195	193	193
AL21	241	250	322	325	146	167	249	249	141	141	179	179	233	233	149	158	222	222	94	94	152	155	198	198	193	193
AL22	244	259	316	325	152	152	249	249	141	141	176	179	233	242	170	173	222	234	94	94	149	152	198	201	193	193
AL23	238	247	319	319	146	152	252	252	141	141	170	176	233	245	137	158	222	222	94	94	146	149	192	192	193	196
AL24	241	244	322	328	152	152	225	246	141	147	176	179	233	242	161	167	222	234	94	94	155	155	198	198	193	196
AL25	244	253	325	337	152	155	243	243	150	156	170	176	233	251	137	170	222	222	94	94	152	158	198	198	193	193
AL26	235	244	331	337	146	152	225	237	141	141	170	176	248	251	167	170	222	234	94	94	152	155	198	198	190	193
AL27	238	250	334	334	152	155	240	246	141	141	173	176	233	242	149	164	222	222	94	94	149	160	192	198	193	193
AL28	238	241	319	328	146	155	240	243	141	141	170	182	233	251	155	164	222	222	94	94	146	158	198	201	193	196
AL29	244	253	319	322	152	152	258	258	141	144	176	179	233	242	149	155	222	222	94	100	143	146	192	195	193	196
AL30	253	253	316	328	152	155	240	246	141	141	176	179	251	251	149	170	222	222	94	94	149	152	198	198	193	193
AL31	235	247	319	328	152	152	249	249	141	141	170	176	233	233	137	137	222	234	94	106	152	158	198	198	196	196
AL32	244	250			146	152	234	249	141	141	176	179	233	233	149	158	222	222	94	94	149	152	198	198	193	196
AL33	244	253	322	325	152	158	252	252	141	147	176	179	233	251	158	176	222	222	94	94	146	155	198	201	190	193
AL34	238	238	325	328	146	158	243	249	138	147	170	185	242	251	158	176	222	222	94	94	152	158	198	198	193	193
AL35	244	250	316	334	146	155	237	258	141	141	176	176	254	254	149	158	222	234	94	100	143	149	192	198	193	196
AL36	238	244	319	337	152	152	237	246	141	141	170	176	242	251	137	158	222	222	94	94	152	152	192	198	193	193
AL37	244	247	331	331	146	152	249	252	141	147	176	179	251	251	170	170	222	234	94	100	149	149	198	198	190	193
AL38	244	250	316	319	152	152	225	246	141	141	182	182	251	257	155	164	222	222	94	94	146	155	198	198	193	196
AL39	235	247	319	325	146	152	225	237	141	141	176	179	233	233	137	158	222	222	94	100	140	149	198	198	193	193
AL40	244	247	331	337	146	146	246	258	141	147	179	182	233	242	170	170	222	222	94	100	146	160	192	198	193	193
AL41			319	319	146	152	249	249	138	141	176	185	251	251	158	161	222	234	94	100	149	155	198	201	193	193
AL42			328	331	146	152	243	249	141	141	176	176	251	257	149	158	222	234	94	94	146	152	198	201	187	193
AL43	241	244	319	319	146	152	249	249	147	156	170	182	233	245	137	155	222	234	94	106	146	146	192	198	193	193
AL44	244	247	316	322	152	167	246	249	138	147	176	179	242	245	152	158	222	222	94	94	143	158	198	198	193	193
AL45	244	250	319	322	146	152	246	249	141	141	170	176	233	245	137	149	222	222	94	94	143	149	192	201	193	193
AL46	232	244	307	319	152	152	261	261	141	147	170	173	251	254	155	176	222	222	94	94	149	164	198	198	193	196
AL47	238	244	319	328	152	155	246	258	141	141	170	170	233	242	155	173	222	234	94	94	146	155	198	198	190	190
AL48			319	328	152	152	243	243	141	141	176	176	233	251	155	167	222	234	94	94	152	155	198	201	193	193
AL49	238	250	316	325	146	146	225	255	141	141	176	176	233	233	155	158	222	234	94	94	155	160	198	198	193	196
AL50	244	250	319	322	152	152	246	246	138	147	179	182	242	251	152	158	222	222	94	97	149	149	198	198	193	196
VE01	235	250			152	155			141	141	170	170	233	251	131	134	222	234	94	97	122	122	201	204	193	196
VE02	235	235			146	149	225	225	141	147	179	179	248	248	134	164	231	237	94	100	152	158	186	204	193	196
VE03	235	256	325	325	149	149			141	147	176	176	233	251	134	170	222	237	94	94	143	152	186	192	193	196
VE04	247	250	313	316	149	152	225	225	141	141	170	182	251	251	134	137	222	222	94	97	152	152	186	192	193	196
VE05	250	250	331	343	149	170	231	258	141	141	170	182	233	251	128	134	234	234	97	100	113	152	192	192	193	196
VE06	247	250	325	328	149	152	243	243	141	147	173	182	233	251	134	155	234	234	94	94	122	152	192	192	193	196
VE07	235	250	316	331	149	152			141	147	170	170	251	251	161	164	231	237	94	94	122	155	192	198	193	196
VE08	247	250	319	322	146	158			147	147	170	182	233	239	164	170	222	234	100	100	122	122	183	213	193	196
VE09	241	250	319	322	152	158			147	147	179	179	233	251	134	158	222	234	94	100	149	155	192	201	193	193
VE10	235	250	319	325	149	152	228	228	141	147	170	170	233	251	134	170	234	234	94	103	152	155	186	192	193	196
VE11	235	253	322	343	158	170	228	231	141	147	190	190	233	251	134	155	222	237	94	100	149	155	186	201	196	196
VE12	247	253	343	361	152	155			141	147	182	182	239	239	134	164	234	234	100	100	143	152	201	201	193	196
VE13	235	250	316	325	149	149			141	147	170	179	254	254	137	161	222	237	94	94	122	146	192	201	193	196
VE14	232	232	316	322	149	152			141	141	170	170	233	251	137	137	222	234	94	106	122	155	201	201	193	196
VE15	232	253	325	343			225	225	141	141	176	182	233	251	128	134	234	234	94	94	149	155	186	186	193	196
VE16	244	253	316	319	146	146	225	225	141	141	173	188	233	239	134	164	234	234	94	100	146	155	192	201	193	196
VE17	247	250	313	325	152	158	237	237	147	147	182	182	239	242	134	155	222	234	97	100	122	143	192	201	193	196
VE18	232	253	322	322	149	152			141	147	179	179	233	233	155	167	222	237	94	94	122	155	183	195	196	196
VE19	235	250	325	343	152	158	225	225	144	147	170	170			155	167	234	234	94	94	149	155	186	192	193	196
VE20	247	247	319	322	164	173	231	243	147	147	182	182	251	251	164	170	231	234	94	94	122	158	192	192	193	193
VE21	235	247	319	322	149	164			141	141	170	179	257	257	137	167	234	234	94	94	152	160	201	201	193	193
VE22	232	250	316	319	149	152			144	144	179	182	233	251	155	155			94	94	122	152	189	213	193	196
VE23	235	244	319	343	149	155	228	228	141	147	164	176	254	254	134	173	222	237	94	103	152	155	201	201	196	196
VE24	247	250	313	325	164	164	243	243	141	144	170	170	233	251	134	134	222	234	94	94	113	152	183	186	193	196
VE25	247	253			149	155	252	252	141	147	170	179	239	239	134	155	222	234	94	94	149	152	180	183	196	196
VE26	247	247	325	343	152	158	225	225	141	144	170	176	233	233	134	155	222	234	94	100	143	155	186	201	193	193
VE27	235	250	325	325	149	173			141	144	176	176	254	254	134	137	231	234	94	94	149	152	186	201	193	193
VE28	244	253	316	325	149	149	246	246	141	147	179	182	239	239	134	134	234	234	94	100	122	158	192	201	193	196
VE29	247	250	328	343	149	152	228	228	141	141	188	188	242	242	134	155	234	234	94	97	122	122	186	192	193	193
VE30	235	250	313	316	149	158			147	150	170	170	239	251	134	137	222	234	100	106	149	152	186	192	193	193
VE31	235	235	319	343	149	152	237	237	147	147	179	179					222	234	94	94	122	149	186	189	196	196
VE32	235	247	313	313	149	149	231	237	141	147	179	179	254	254			231	234	94	100	155	158	186	192	193	193
VE33	235	250	322	322	149	155	234	234	144	147	170	170	233	233	134	134	234	234	94	94	149	152	213	213	193	196
VE34	232	247	319	331	149	152	237	237	141	141	170	170	239	239	134	134	234	234	94	100	122	155	183	192	193	196
VE35	235	244	319	322	149	152	243	243	141	141	179	182	239	239	164	164	222	234	94	97	113	143	186	216	193	193
VE36	244	247	334	343	149	161	243	249	141	147	170	176			134	170	234	234	94	94	122	158	192	192	193	196
VE37	247	250	319	343	149	149	225	249	141	147	170	188	239	239	149	155	234	234	94	100	149	158	183	213	193	196
VE38	235	247	325	328	149	167	225	231	147	147	176	176	239	254	164	173	222	222	94	94	155	158	189	201	193	196
VE39	247	250	313	343	149	149	237	237	147	147	170	182	254	254	134	167	234	234	100	103	152	158	177	219	196	196
VE40	232	235	319	343	149	149	231	231	147	147	167	170	233	233	134	152	222	237	94	100	146	155	183	201	193	196
VE41	232	253	316	319	149	149	228	249	147	147	170	170	251	251	131	134	222	234	100	100	122	149	201	204	193	196
VE42	235	247	322	322	149	152	225	225	147	147	176	179	239	242	158	167	234	234	94	94	152	155	192	201	193	193
VE43	247	250	325	328	158	158	225	228	141	147	170	188	242	242	128	134	222	234	94	100	146	149	186	195	193	193
VE44	250	253	316	316	152	167	249	249	147	147	176	176	239	239	131	170	231	234	94	103	143	146	192	201	193	193
VE45											182	182	239	242	134	134	222	222	94	94	146	146	186	186
VE46	238	250	316	343	155	158	249	249	147	147	188	188	233	233	137	164	222	234	94	94	149	155	186	186	196	196
VE47	247	250	343	343	149	161			147	147	179	182	233	242	134	161	234	234	94	94	113	155	186	201	196	196
VE48	232	232	316	316	149	158	237	237	141	144	170	170	233	242	134	137	222	237	94	94	122	122			196	196
VE49	235	250	319	328	149	158	231	231	141	141	170	176	245	245	134	134	222	222	94	94	152	155	192	201	193	193
VE50	235	244	325	331	146	155	234	246	147	147	179	179			137	143	234	237	100	103	137	158	192	219	193	193
