# Supplementary material for: Genetic variability inRuditapes decussatusclam combined withPerkinsusinfection level to support founder population selection for a breeding program
Source: PeerJ journal article supplement (doi:10.7717/peerj.9728), 2020-10-28
Supplement: TableS3.xlsx [file TableS3.xlsx]

## Sheet: Comparative analysis
		Frequency in non-infected samples		Frequency in infected samples		Frequency in infected samples including Venice population
Microsatellite	Alelle	Number of appearances	%	Number of appearances	%	Number of appearances	%
RdATC-125	146	48	15.3846	47	12.7027	52	11.1588
	149	2	0.641026	2	0.540541	43	9.22747
	152	149	47.7564	205	55.4054	224	48.0687
	155	42	13.4615	55	14.8649	62	13.3047
	158	4	1.28205	7	1.89189	19	4.07725
	161	11	3.52564	10	2.7027	12	2.57511
	164	5	1.60256	3	0.810811	7	1.50215
	167	41	13.141	33	8.91892	35	7.51073
	170	9	2.88462	6	1.62162	8	1.71674
	173	1	0.320513	2	0.540541	4	0.858369
	Total	312	100	370	100	466	100
RdATC-215	128	0	0	0	0	3	0.649351
	131	1	0.320513	0	0	3	0.649351
	134	6	1.92308	9	2.45902	47	10.1732
	137	33	10.5769	42	11.4754	52	11.2554
	143	2	0.641026	9	2.45902	10	2.1645
	146	11	3.52564	12	3.27869	12	2.5974
	149	22	7.05128	42	11.4754	43	9.30736
	152	34	10.8974	19	5.19126	20	4.329
	155	63	20.1923	61	16.6667	72	15.5844
	158	45	14.4231	52	14.2077	54	11.6883
	161	5	1.60256	9	2.45902	12	2.5974
	164	12	3.84615	17	4.64481	27	5.84416
	167	26	8.33333	21	5.7377	26	5.62771
	170	32	10.2564	45	12.2951	51	11.039
	173	13	4.16667	15	4.09836	17	3.67965
	176	6	1.92308	11	3.00546	11	2.38095
	179	1	0.320513	0	0	0	0
	182	0	0	2	0.546448	2	0.4329
	Total	312	100	366	100	462	100
RdATC-238	113	0	0	0	0	4	0.877193
	122	0	0	0	0	21	4.60526
	137	0	0	0	0	1	0.219298
	140	12	3.65854	7	1.96629	7	1.53509
	143	43	13.1098	28	7.86517	34	7.45614
	146	72	21.9512	71	19.9438	78	17.1053
	149	51	15.5488	50	14.0449	63	13.8158
	152	56	17.0732	71	19.9438	90	19.7368
	155	63	19.2073	82	23.0337	101	22.1491
	158	24	7.31707	29	8.14607	38	8.33333
	160	6	1.82927	11	3.08989	12	2.63158
	164	1	0.304878	7	1.96629	7	1.53509
	Total	328	100	356	100	456	100
RdATC-263	177	0	0	2	0.537634	3	0.638298
	180	0	0	0	0	1	0.212766
	183	2	0.628931	4	1.07527	11	2.34043
	186	0	0	0	0	22	4.68085
	189	0	0	1	0.268817	4	0.851064
	192	90	28.3019	93	25	119	25.3191
	195	2	0.628931	1	0.268817	3	0.638298
	198	156	49.0566	205	55.1075	206	43.8298
	201	59	18.5535	54	14.5161	78	16.5957
	204	9	2.83019	11	2.95699	14	2.97872
	213	0	0	1	0.268817	6	1.2766
	216	0	0	0	0	1	0.212766
	219	0	0	0	0	2	0.425532
	Total	318	100	372	100	470	100
