# Supplementary material for: Genetic variability inRuditapes decussatusclam combined withPerkinsusinfection level to support founder population selection for a breeding program
Source: PeerJ journal article supplement (doi:10.7717/peerj.9728), 2020-10-28
Supplement: TableS4.xlsx [file TableS4.xlsx]

## Sheet: Comparative analysis
	Results of the Correspondence Analysis between infected vs non infected clams			Results of the Correspondence Analysis between infected vs non infected clams including VE population
	coord			$coord
	Non infected	Infected		Non- infected	Infected + VE
	-13.301	0.132424		-0.1931085 0.1987287
	$contrib			$contrib
	Non infected	Infected		Non- infected	Infected + VE
	50.1104	49.8896		49.28284 50.71716
	$cos2			$cos2
	1 2			1 2
	1 1			1 1
	$inertia			$inertia
	[1] 0.008826355 0.008787464			[1] 0.01891288 0.01946332
	Alleles	Correspondence		Alleles	Correspondence
	Rd125-149	-0.0869539		Rd125-149	0.884715
	Rd125-152	0.0719417		Rd125-152	0.0175662
	Rd125-155	0.0472272		Rd125-155	0.00854254
	Rd125-158	0.190222		Rd125-158	0.536542
	Rd125-161	-0.135435		Rd125-161	-0.14208
	Rd125-164	-0.33001		Rd125-164	-0.0172025
	Rd125-167	-0.193505		Rd125-167	-0.258278
	Rd125-170	-0.282209		Rd125-170	-0.238744
	Rd125-173	0.253607		Rd125-173	0.471268
	Rd215-134	0.120095		Rd215-134	0.696452
	Rd215-137	0.0385355		Rd215-137	0.0454252
	Rd215-143	0.584234		Rd215-143	0.557427
	Rd215-146	-0.0385015		Rd215-146	-0.137268
	Rd215-149	0.23659		Rd215-149	0.152272
	Rd215-152	-0.356879		Rd215-152	-0.417083
	Rd215-155	-0.0978603		Rd215-155	-0.114464
	Rd215-158	-0.00973227		Rd215-158	-0.0904006
	Rd215-161	0.208659		Rd215-161	0.251237
	Rd215-164	0.0918517		Rd215-164	0.220552
	Rd215-167	-0.186674		Rd215-167	-0.179474
	Rd215-170	0.088193		Rd215-170	0.051096
	Rd215-173	-0.0104724		Rd215-173	-0.0477306
	Rd215-176	0.217409		Rd215-176	0.120739
	Rd238-140	-0.303061		Rd238-140	-0.394554
	Rd238-143	-0.252249		Rd238-143	-0.260586
	Rd238-146	-0.050123		Rd238-146	-0.109744
	Rd238-149	-0.0530241		Rd238-149	-0.0446777
	Rd238-152	0.0753418		Rd238-152	0.0867149
	Rd238-155	0.088377		Rd238-155	0.085485
	Rd238-158	0.0514032		Rd238-158	0.0792865
	Rd238-160	0.25406		Rd238-160	0.194219
	Rd238-164	0.729317		Rd238-164	0.683018
	Rd263-183	0.259697		Rd263-183	0.59079
	Rd263-192	-0.064155		Rd263-192	-0.0412872
	Rd263-195	-0.403339		Rd263-195	0.0217373
	Rd263-198	0.0558825		Rd263-198	-0.0419321
	Rd263-201	-0.124294		Rd263-201	-0.0413582
	Rd263-204	0.0197027		Rd263-204	0.0399175
